# Supplementary material
Source: PubMed Central journal article supplement (PMC3250984)
Supplement: NIHMS335099-supplement-Garten_SOM.pdf [file NIHMS335099-supplement-Garten_SOM.pdf]

## **Supporting Online Material**

### **Antigenic and Genetic Characteristics of the Early Isolates of Swine-Origin 2009 A(H1N1) Influenza Viruses Circulating in Humans**

Rebecca J. Garten, C. Todd Davis, Colin A. Russell, Bo Shu, Stephen Lindstrom,  
Amanda Balish, Wendy M. Sessions, Xiyan Xu, Eugene Skepner, Varough Deyde,  
Margaret Okomo-Adhiambo, Larisa Gubareva, John Barnes, Catherine B. Smith,  
Shannon L. Emery, Michael J. Hillman, Pierre Rivaille, James Smagala, Miranda de  
Graaf, David F. Burke, Ron A. M. Fouchier, Claudia Pappas, Celia M. Alpuche-  
Aranda, Hugo López-Gatell, Hiram Olivera, Irma López, Christopher A. Myers,  
Dennis Faix, Patrick J. Blair, Cindy Yu, Kimberly M. Keene, P. David Dotson, Jr.,  
David Boxrud, Anthony R. Sambol, Syed H. Abid, Kirsten St. George, Tammy  
Bannerman, Amanda L. Moore, David J. Stringer, Patricia Blevins, Gail J. Demmler-  
Harrison, Michele Ginsberg, Paula Kriner, Steve Waterman, Sandra Smole, Hugo F.  
Guevara, Edward A. Belongia, Patricia A. Clark, Sara T. Beatrice, Ruben Donis,  
Jacqueline Katz, Lyn Finelli, Carolyn B. Bridges, Michael Shaw, Daniel B. Jernigan,  
Timothy M. Uyeki, Derek J. Smith, Alexander I. Klimov, Nancy J. Cox

**Table S1.** GenBank accession numbers of nucleotide sequences of 2009 A(H1N1) viruses used in genetic analyses.

| Strain designation       | Passage Level    | GENBANK PB2 | GENBANK PB1 | GENBANK PA | GENBANK HA | GENBANK NP | GENBANK NA | GENBANK M | GENBANK NS |
|--------------------------|------------------|-------------|-------------|------------|------------|------------|------------|-----------|------------|
| A/ARIZONA/01/2009        | MX/C1            |             |             |            | GQ117067   | GQ117063   | GQ117064   | GQ117066  | GQ117065   |
| A/ARIZONA/02/2009        | C1               | GQ117076    | GQ117075    |            | GQ117079   | GQ117074   | GQ117077   | GQ117078  |            |
| A/CALIFORNIA/04/2009     | C2               | FJ969516    |             | FJ969515   | GQ117044   | FJ969512   | FJ969517   | FJ969513  | FJ969514   |
| A/CALIFORNIA/04/2009     | CX               | FJ969079    | FJ966080    | FJ969081   | FJ966082   | FJ966083   | FJ966084   | FJ966085  | FJ966086   |
| A/CALIFORNIA/05/2009     | C1               | FJ969595    | FJ969598    | FJ969597   | FJ966952   | FJ966953   | FJ966956   | FJ966954  |            |
| A/CALIFORNIA/06/2009     | M1               | FJ969663    | FJ969665    | FJ969664   | FJ966960   | FJ966961   | FJ9671075  | FJ966962  | FJ9671074  |
| A/CALIFORNIA/06/2009     | M1/C1            |             |             |            |            |            |            |           |            |
| A/CALIFORNIA/07/2009     | C1               | FJ969530    | FJ969531    | FJ969529   | FJ981613   |            |            | FJ969527  | FJ969528   |
| A/CALIFORNIA/07/2009     | E2               | FJ984387    |             | FJ969539   | FJ969540   | FJ969536   | FJ984386   | FJ969537  | FJ969538   |
| A/CALIFORNIA/07/2009     | M1               | FJ969678    | FJ969678    | FJ969677   | FJ966974   |            |            | FJ966975  |            |
| A/CALIFORNIA/07/2009     | M1/C1            |             |             |            |            |            |            |           |            |
| A/CALIFORNIA/08/2009     | C1               |             |             |            |            |            |            | FJ969518  | FJ969519   |
| A/CALIFORNIA/08/2009     | E2               | FJ984365    | FJ984367    | FJ984368   | FJ971076   | FJ984366   |            | FJ969532  | FJ969533   |
| A/CALIFORNIA/09/2009     | Original         |             |             |            | FJ966971   |            | FJ966973   | FJ966972  | FJ969538   |
| A/CALIFORNIA/10/2009     | Original         |             |             |            | FJ969511   |            |            | FJ969510  |            |
| A/CALIFORNIA/11/2009     | C1               |             |             |            | GQ160579   |            |            |           |            |
| A/CALIFORNIA/12/2009     | C1               |             |             |            | GQ160506   |            |            |           |            |
| A/CALIFORNIA/13/2009     | C1               |             |             |            | GQ160607   |            |            |           |            |
| A/CALIFORNIA/14/2009     | C1               | GQ117035    | GQ117034    | GQ117037   | GQ117040   | GQ117033   | GQ117036   | GQ117039  | GQ117038   |
| A/COLORADO/03/2009       | C1               |             | GQ168884    |            | GQ117119   | GQ117117   | GQ117118   |           |            |
| A/INDIANA/09/2009        | C1               | GQ168870    | GQ117093    | GQ117095   | GQ117097   | GQ117092   | GQ117094   | GQ117096  | GQ168871   |
| A/MASSACHUSETTS/06/2009  | C1               |             | GQ168847    |            | GQ117043   | GQ117041   | GQ117042   | GQ168849  | GQ168848   |
| A/MASSACHUSETTS/07/2009  | C1               |             | GQ168873    |            | GQ117103   | GQ117101   | GQ117102   | GQ168874  | GQ168874   |
| A/MEXICO/395/2009        | E2               |             |             |            | GQ162194   |            | GQ162193   |           |            |
| A/MEXICO/395/2009        | Original         |             |             |            |            |            |            |           |            |
| A/MEXICO/108/2009        | C1/C1            | GQ162180    |             | GQ149653   | GQ149662   | GQ149660   | GQ149659   | GQ149657  | GQ149658   |
| A/MEXICO/108/2009        | C1               |             |             | GQ149686   | GQ149689   | GQ149685   | GQ149688   | GQ149690  | GQ149687   |
| A/MEXICO/108/2009        | Original         |             |             |            | GQ149651   |            | GQ149650   | GQ149649  |            |
| A/MEXICO/108/2009        | C1-IR            |             | GQ149652    | GQ149661   | GQ149654   | GQ149655   | GQ149656   | GQ162179  |            |
| A/MEXICO/108/2009        | E1               |             |             |            | GQ149668   | GQ149667   |            | GQ149666  |            |
| A/MEXICO/108/2009        | E2               |             |             |            | GQ162170   |            | GQ162169   |           |            |
| A/MEXICO/115/2009        | C1               | GQ162199    |             |            | GQ149692   | GQ149693   |            | GQ149691  | GQ149694   |
| A/MEXICO/415/2009        | Original         |             |             |            |            |            |            |           |            |
| A/MEXICO/417/2009        | C1/C1            |             |             |            | GQ162182   |            | GQ162181   |           |            |
| A/MEXICO/4269/2009       | C1/C1            |             |             |            | GQ162172   |            | GQ162171   |           |            |
| A/MEXICO/4482/2009       | Original         |             |             |            | GQ149671   |            | GQ149670   |           |            |
| A/MEXICO/4482/2009       | C1-IR            |             | GQ149675    | GQ149676   | GQ149677   | GQ149678   |            | GQ162192  |            |
| A/MEXICO/4482/2009       | E2               |             |             |            | GQ162190   |            | GQ162189   |           |            |
| A/MEXICO/4482/2009       | C1               |             |             |            | GQ149674   | GQ149673   | GQ149672   |           |            |
| A/MEXICO/4486/2009       | C1/C1            | GQ162177    | GQ162176    | GQ149646   | GQ149647   | GQ149645   | GQ149644   | GQ149642  | GQ149643   |
| A/MEXICO/4486/2009       | C1               | GQ149617    | GQ149618    | GQ149620   | GQ149623   | GQ149619   | GQ149622   | GQ149624  | GQ149621   |
| A/MEXICO/4486/2009       | Original         |             |             |            | GQ149665   |            | GQ149664   | GQ149663  |            |
| A/MEXICO/4486/2009       | C1-IR            |             | GQ162186    |            | GQ162185   | GQ162184   | GQ162187   | GQ162188  |            |
| A/MEXICO/4486/2009       | E2               |             |             |            | GQ162202   |            | GQ162201   |           |            |
| A/MEXICO/4502/2009       | C1/C1            |             |             |            | GQ162195   |            |            |           |            |
| A/MEXICO/4516/2009       | C1               |             |             |            |            | GQ149648   |            | GQ162178  |            |
| A/MEXICO/4575/2009       | C1/C1            |             |             |            | GQ162197   |            | GQ162196   |           |            |
| A/MEXICO/4593/2009       | C1/C1            |             |             |            | GQ162174   |            | GQ162173   |           |            |
| A/MEXICO/4595/2009       | C1/C1            |             |             |            | GQ162191   |            |            |           |            |
| A/MEXICO/4603/2009       | C1/C1            | GQ162198    | GQ149683    |            | GQ149684   | GQ149682   | GQ149681   | GQ149679  | GQ149680   |
| A/MEXICO/4603/2009       | C1               | GQ162168    | GQ162167    | GQ149627   | GQ149630   | GQ149628   | GQ149629   | GQ149626  | GQ149625   |
| A/MEXICO/4603/2009       | C1/E2            |             |             |            | GQ149641   | GQ149639   | GQ149640   | GQ162175  |            |
| A/MEXICO/4604/2009       | C1               | GQ149632    | GQ149633    | GQ149636   | GQ149634   | GQ149637   | GQ149631   | GQ149638  | GQ149635   |
| A/MEXICO/4627/2009       | C1/C1            |             |             |            | GQ162183   |            |            |           |            |
| A/MEXICO/4635/2009       | C1/C1            |             |             |            | GQ162200   |            |            |           |            |
| A/MEXICO/4646/2009       | C1/C1            |             |             |            | GQ162204   |            |            | GQ162203  |            |
| A/MICHIGAN/02/2009       | C1               |             | GQ168880    | GQ117109   | GQ117112   | GQ117107   | GQ117108   | GQ117111  | GQ117110   |
| A/MINNESOTA/10/2009      | C1               | GQ117070    | GQ117069    |            | GQ117068   | GQ117071   | GQ117072   | GQ117073  | GQ117072   |
| A/NEBRASKA/02/2009       | C1               |             | GQ168875    |            | GQ168875   | GQ117104   | GQ117105   |           | GQ117106   |
| A/NEBRASKA/03/2009       | E2               | GQ160597    | GQ160596    |            | GQ160599   | GQ160595   |            |           | GQ160598   |
| A/NEW YORK/04/2009       | C1               |             |             |            | GQ160568   |            |            |           |            |
| A/NEW YORK/05/2009       | E2               |             |             |            | GQ160542   |            |            |           |            |
| A/NEW YORK/06/2009       | C1               |             | GQ168850    |            | GQ168851   | FJ984341   | FJ984340   | FJ984338  | FJ984339   |
| A/NEW YORK/08/2009       | E2               |             |             |            | GQ168850   |            | GQ168848   | GQ168849  |            |
| A/NEW YORK/09/2009       | E2               |             |             |            | GQ168855   |            | GQ168854   |           |            |
| A/NEW YORK/09/2009       | C1               |             | GQ117120    |            | GQ168856   |            |            |           |            |
| A/NEW YORK/10/2009       | C1               | GQ168876    | FJ984373    | FJ984374   | FJ984375   | FJ984372   | FJ984371   | FJ984369  | FJ984370   |
| A/NEW YORK/11/2009       | C1               |             | GQ168852    | FJ984346   | FJ984347   | FJ984345   | FJ984344   | FJ984342  | FJ984343   |
| A/NEW YORK/11/2009       | E2               |             |             |            | GQ168652   |            | GQ168651   |           |            |
| A/NEW YORK/12/2009       | C1               |             | GQ168844    |            | FJ984337   | FJ984336   | FJ984335   | GQ168845  | FJ984334   |
| A/NEW YORK/12/2009       | E2               |             |             |            | GQ168673   |            | GQ168672   |           |            |
| A/NEW YORK/13/2009       | C1               |             | GQ168881    | GQ117115   | GQ117116   | GQ117113   | GQ117114   | GQ168883  | GQ168882   |
| A/NEW YORK/13/2009       | C1               |             |             |            | GQ168668   |            | GQ168666   | GQ168667  |            |
| A/NEW YORK/14/2009       | E2               |             |             |            | GQ168657   |            | GQ168656   |           |            |
| A/NEW YORK/15/2009       | C1               | GQ168878    | GQ168877    | FJ984380   |            | FJ984379   | FJ984378   | FJ984376  | FJ984377   |
| A/NEW YORK/18/2009       | C1               | FJ984351    | FJ984353    | FJ984354   | FJ984355   | FJ984352   | FJ984350   | FJ984348  | FJ984349   |
| A/NEW YORK/18/2009       | E2               |             |             |            | GQ160556   |            |            |           |            |
| A/NEW YORK/19/2009       | C1               |             | FJ984392    | FJ984393   | FJ984394   | FJ984391   | FJ984390   | FJ984388  | FJ984389   |
| A/NEW YORK/19/2009       | Original         |             |             |            | FJ969509   |            |            |           |            |
| A/NEW YORK/20/2009       | C1               |             |             |            | GQ117082   | GQ117080   | GQ117081   | GQ168863  | GQ168862   |
| A/NEW YORK/20/2009       | E2               |             | GQ168867    |            | GQ117086   | GQ117083   | GQ117084   | GQ117085  | GQ168868   |
| A/NEW YORK/20/2009       | Original         |             |             |            | FJ969542   |            | FJ969541   |           |            |
| A/NEW YORK/22/2009       | C1               | GQ117021    | GQ117020    |            | GQ117024   | GQ117019   | GQ117022   | GQ117023  | GQ168846   |
| A/NEW YORK/23/2009       | C1               |             | GQ168864    | GQ168865   | FJ984364   | FJ984363   | FJ984362   | GQ168866  | FJ984361   |
| A/NEW YORK/23/2009       | E2               |             |             |            | GQ168628   |            | GQ168627   |           |            |
| A/NEW YORK/24/2009       | C1               |             |             |            | GQ160601   |            |            | GQ160600  |            |
| A/NEW YORK/24/2009       | E2               |             |             |            |            |            | GQ168669   |           |            |
| A/NEW YORK/26/2009       | E2               |             |             |            | GQ168617   |            |            |           |            |
| A/NEW YORK/27/2009       | E2               |             |             |            | GQ168659   |            |            | GQ168658  |            |
| A/NEW YORK/28/2009       | E2               |             |             |            | GQ168645   |            |            |           |            |
| A/NEW YORK/30/2009       | C1               |             |             |            | GQ160566   |            |            |           |            |
| A/NEW YORK/31/2009       | C1               |             |             | FJ984359   | FJ984360   | FJ984358   | FJ984357   | GQ168859  | FJ984356   |
| A/NEW YORK/31/2009       | E2               |             |             |            | GQ168661   |            |            | GQ168660  |            |
| A/NEW YORK/34/2009       | C1               |             |             |            | GQ160567   |            |            |           |            |
| A/NEW YORK/35/2009       | C1               |             |             |            | GQ160543   |            |            |           |            |
| A/NEW YORK/37/2009       | C1               |             |             |            | GQ160527   |            |            |           |            |
| A/NEW YORK/39/2009       | C1               |             |             |            | GQ160602   |            |            |           |            |
| A/OHIO/07/2009           | C1-NP            | GQ160545    | GQ160544    | FJ984400   | FJ984401   | GQ117098   | GQ117099   | FJ984398  | FJ984399   |
| A/OHIO/07/2009           | E2               |             |             |            | GQ117100   |            | GQ117098   |           | GQ168872   |
| A/OHIO/07/2009           | C1               |             | GQ168887    |            | FJ984397   | FJ984396   |            | FJ984395  |            |
| A/OHIO/07/2009           | Original         |             |             |            | FJ969521   |            | FJ969520   |           |            |
| A/OHIO/07/2009           | Original-NP WASH |             |             |            | FJ969535   |            | FJ969534   |           |            |
| A/SOUTH CAROLINA/09/2009 | C1               |             | GQ168854    |            | GQ117056   | GQ117052   | GQ117053   | GQ117055  | GQ117054   |
| A/TEXAS/04/2009          | X/C1             | GQ168885    | FJ981616    | FJ981619   | FJ981615   | FJ981618   | FJ981614   | FJ981617  | FJ981620   |
| A/TEXAS/04/2009          | X                | FJ969525    | FJ969526    | FJ969524   | FJ981612   | FJ969679   | FJ969681   | FJ969680  |            |
| A/TEXAS/04/2009          | Original         |             |             |            | FJ966982   |            |            | FJ966983  |            |
| A/TEXAS/05/2009          | X                |             | FJ969522    | FJ969670   |            | FJ969667   | FJ969669   | FJ969668  | FJ969666   |
| A/TEXAS/05/2009          | C1               |             | GQ168860    | FJ981610   | GQ168861   | FJ981609   |            | FJ981608  | FJ981611   |
| A/TEXAS/05/2009          | Original         |             |             |            | FJ966959   |            |            |           |            |
| A/TEXAS/05/2009          | X/C1             |             |             |            |            |            |            |           |            |
| A/TEXAS/06/2009          | C1               | GQ168879    |             |            | FJ984385   | FJ984384   | FJ984383   | FJ984381  | FJ984382   |
| A/TEXAS/07/2009          | C1               | GQ117089    | GQ117088    |            | GQ117091   | GQ117087   |            | GQ117090  | GQ168869   |
| A/TEXAS/08/2009          | C1               | GQ117047    | GQ117046    | GQ117049   | GQ117051   | GQ117045   | GQ117048   | GQ117050  | GQ168853   |
| A/TEXAS/08/2009          | E2               |             |             |            | GQ168633   |            | GQ168632   |           |            |
| A/TEXAS/09/2009          | C1               | GQ117027    | GQ117026    | GQ117029   | GQ117032   | GQ117025   | GQ117028   | GQ117031  | GQ117030   |
| A/TEXAS/09/2009          | E2               |             |             |            | GQ168671   |            | GQ168670   |           |            |
| A/TEXAS/15/2009          | C1               |             | GQ122094    |            | G          |            |            |           |            |

**Table S2.** Geographic isolation of five early genome variants of the 2009 A(H1N1) virus. Con. indicates consensus sequence.

| Genome variants | Location                                                         | HA          | NA           | NP    | NS1   | PA    |
|-----------------|------------------------------------------------------------------|-------------|--------------|-------|-------|-------|
| i               | Mexico, Arizona, California, Colorado, Texas                     | Con.        | Con.         | Con.  | Con.  | Con.  |
| ii              | Mexico, Arizona, California, Indiana, Minnesota, Nebraska, Texas | Con.        | Con.         | T373I | Con.  | M582L |
| iii             | Mexico, Michigan                                                 | Con.        | V106I, N247D | V100I | Con.  | Con.  |
| iv              | California, Massachusetts, Nebraska, New York, Ohio              | S206T       | V106I, N247D | V100I | I123V | Con.  |
| v               | California                                                       | S91P, V323I | Con.         | Con.  | Con.  | S224P |

**Table S3.** Hemagglutination Inhibition (HI) assay (Kendal et al, 1982) of the 2009 A(H1N1) outbreak isolates A/California/4/2009 and A/California/5/2009; together with reference antigens and contemporary swine H1 antigens. Swine influenza viruses previously isolated from humans and sera raised to those viruses are shown in blue. Human seasonal influenza viruses and sera raised to those viruses are shown in green. 2009 A(H1N1) viruses are shown in red.

## HEMAGGLUTININ INHIBITION REACTIONS OF INFLUENZA SPECIMENS (04/23/2009)

| STRAIN DESIGNATION              | REFERENCE FERRET ANTISERA |      |         |       |       |       |       |       |     | DATE COLLECTED | PASSAGE        |
|---------------------------------|---------------------------|------|---------|-------|-------|-------|-------|-------|-----|----------------|----------------|
|                                 | WI/10                     | OH/2 | IL/9/07 | SW/IA | SW/MN | SW/IN | BR/59 | BR/10 |     |                |                |
| A/WISCONSIN/10/98 <sup>a</sup>  | 2560                      | 5120 | 1280    | 1280  | 1280  | 1280  | 5     | 5     |     | 31/12/98       | C3/C3E2)       |
| A/OHIO/2/2007 <sup>a</sup>      | 1280                      | 5120 | 2560    | 2560  | 2560  | 2560  | 5     | 5     |     | 17/8/07        | C1             |
| A/ILLINOIS/9/2007 <sup>a</sup>  | 640                       | 5120 | 5120    | 2560  | 512   | 5120  | 5     | 5     |     | 1/9/07         | MX/C3          |
| A/SWINE/IOWA/2006               | 320                       | 5120 | 640     | 2560  | 1280  | 640   | 5     | 5     |     | 1/11/06        | C2/C1          |
| A/SWINE/MINNESOTA/2002          | 640                       | 5120 | 640     | 1280  | 2560  | 2560  | 5     | 5     |     | UNKNOWN        | SIVCX/C3       |
| A/SWINE/INDIANA/2000            | 320                       | 5120 | 640     | 640   | 640   | 1280  | 5     | 5     |     | UNKNOWN        | SIVCX/C3       |
| A/BRISBANE/59/2007 <sup>b</sup> | 5                         | 5    | 5       | 5     | 5     | 5     | 5     | 640   | 5   | 1/7/07         | E2/E2          |
| A/BRISBANE/10/2007 <sup>c</sup> | 5                         | 5    | 5       | 5     | 5     | 5     | 5     | 640   | 640 | 6/2/07         | E2/E2)         |
| <b>TEST ANTIGENS</b>            |                           |      |         |       |       |       |       |       |     |                |                |
| A/CALIFORNIA/4/2009             | 640                       | 5120 | 640     | 2560  | 1280  | 1280  | 5     | 5     |     | 1/4/09         | C1(4/22/09)    |
| A/CALIFORNIA/4/2009             | 640                       | 5120 | 1280    | 320   | 5120  | 2560  | 5     | 5     |     | 1/4/09         | C1/C1(4/22/09) |
| A/CALIFORNIA/5/2009             | 320                       | 5120 | 640     | 1280  | 1280  | 1280  | 5     | 5     |     | 30/3/09        | C1(4/22/09)    |

- a. Triple reassortant swine-like H1N1 virus  
b. Seasonal H1N1 reference strain  
c. Seasonal H3N2 reference strain

**Table S4.** HI assay table of 2009 A(H1N1) outbreak isolates from the USA and from Mexico. Swine influenza viruses previously isolated from humans and sera raised to those viruses are shown in blue. 2009 A(H1N1) viruses and sera raised to those viruses are shown in red.

## HEMAGGLUTINATION INHIBITION REACTIONS OF INFLUENZA H1N1 SWINE LIKE VIRUSES(05/0709)

| STRAIN DESIGNATION       | REFERENCE FERRET ANTISERA |         |      |       |      |       |       | DATE COLLECTED | PASSAGE  |          |
|--------------------------|---------------------------|---------|------|-------|------|-------|-------|----------------|----------|----------|
|                          | SW/IA/30                  | NJ/8/76 | OH/2 | WI/10 | IL/9 | CA/04 | CA/05 |                |          |          |
| A/SWINE/IOWA/1930        | 320                       | 40      | 5    | 5     | 5    | 5     | 5     | 20             | UNK      | XEXE6    |
| A/NEWJERSEY/8/1976       | 80                        | 160     | 5    | 10    | 5    | 5     | 5     | 40             | UNK      | SpfE6    |
| A/OHIO/2/2007            | 80                        | 1280    | 5120 | 640   | 5120 | 2560  | 5120  | 2560           | 08/18/11 | C1       |
| A/WISCONSIN/10/98        | 5                         | 2560    | 5120 | 1280  | 2560 | 640   | 2560  | 640            | 01/01/03 | C3/C3E2  |
| A/ILLINOIS/9(33304)/2007 | 80                        | 1280    | 5120 | 1280  | 5120 | 2560  | 5120  | 2560           | 09/02/11 | C1       |
| A/California/04/2009     | 10                        | 320     | 5120 | 320   | 640  | 1280  | 2560  | 640            | 04/02/13 | C2       |
| A/California/05/2009     | 40                        | 320     | 5120 | 320   | 1280 | 1280  | 5120  | 1280           | 03/31/13 | C2)      |
| A/Swine/Minnesota/2002   | 40                        | 640     | 5120 | 640   | 2560 | 1280  | 5120  | 2560           | UNK      | SIVCX/C3 |
| <b>TEST ANTIGENS</b>     |                           |         |      |       |      |       |       |                |          |          |
| A/California/06/2009     | 80                        | 640     | 5120 | 640   | 2560 | 1280  | 5120  | 1280           | 04/17/13 | M1/C1    |
| A/California/07/2009     | 320                       | 1280    | 5120 | 1280  | 5120 | 2560  | 5120  | 2560           | 04/10/13 | C1       |
| A/California/07/2009     | 80                        | 640     | 5120 | 320   | 1280 | 2560  | 5120  | 1280           | 04/10/13 | E2       |
| A/California/08/2009     | 160                       | 1280    | 5120 | 640   | 2560 | 2560  | 5120  | 2560           | 04/10/13 | C1       |
| A/California/08/2009     | 160                       | 320     | 5120 | 320   | 1280 | 2560  | 5120  | 1280           | 04/10/13 | E2       |
| A/Kansas/2/2009          | 160                       | 640     | 5120 | 640   | 2560 | 2560  | 5120  | 1280           | 04/25/13 | C1       |
| A/Kansas/3/2009          | 40                        | 320     | 2560 | 320   | 640  | 1280  | 5120  | 640            | 04/25/13 | C1       |
| A/Ohio/07/2009           | 80                        | 640     | 2560 | 640   | 1280 | 1280  | 5120  | 640            | 04/25/13 | E2       |
| A/Ohio/07/2009           | 80                        | 640     | 5120 | 320   | 1280 | 1280  | 5120  | 640            | 04/25/13 | C1       |
| A/New York/07/2009       | 40                        | 320     | 2560 | 320   | 1280 | 640   | 2560  | 1280           | UNK      | E2       |
| A/New York/7/2009        | 40                        | 320     | 2560 | 320   | 640  | 640   | 2560  | 640            | UNK      | C1       |
| A/New York/08/2009       | 80                        | 320     | 2560 | 320   | 1280 | 1280  | 2560  | 640            | 04/26/13 | E2       |
| A/New York/8/2009        | 40                        | 320     | 2560 | 160   | 640  | 640   | 2560  | 640            | 04/26/13 | C1       |
| A/New York/18/2009       | 160                       | 1280    | 2560 | 640   | 2560 | 2560  | 5120  | 2560           | UNK      | E2       |
| A/New York/20/2009       | 160                       | 640     | 5120 | 640   | 2560 | 5120  | 5120  | 1280           | UNK      | E2       |
| A/New York/23/2009       | 160                       | 640     | 2560 | 320   | 1280 | 1280  | 5120  | 1280           | 04/25/13 | C1       |
| A/New York/23/2009       | 80                        | 640     | 5120 | 640   | 1280 | 640   | 5120  | 1280           | 04/25/13 | E2       |
| A/New York/31/2009       | 40                        | 320     | 2560 | 320   | 640  | 640   | 2560  | 640            | 04/25/13 | C1       |
| A/New York/31/2009       | 80                        | 640     | 5120 | 640   | 1280 | 1280  | 5120  | 1280           | 04/25/13 | E2       |
| A/Texas/04/2009          | 20                        | 160     | 1280 | 160   | 640  | 640   | 1280  | 640            | 04/15/13 | X/C1     |
| A/Texas/05/2009          | 320                       | 1280    | 5120 | 640   | 2560 | 2560  | 5120  | 2560           | 04/16/13 | X/C1     |
| A/Texas/06/2009          | 80                        | 640     | 5120 | 320   | 2560 | 1280  | 2560  | 1280           | 04/24/13 | C1       |
| A/Texas/7/2009           | 40                        | 320     | 2560 | 320   | 1280 | 1280  | 2560  | 1280           | 04/26/13 | C1       |
| A/Texas/08/2009          | 40                        | 320     | 5120 | 320   | 1280 | 1280  | 2560  | 640            | 04/25/13 | E2       |
| A/Texas/8/2009           | 40                        | 320     | 2560 | 320   | 1280 | 1280  | 2560  | 640            | 04/25/13 | C1       |
| A/Texas/09/2009          | 80                        | 640     | 2560 | 320   | 1280 | 1280  | 5120  | 640            | 04/26/13 | E2       |
| A/Texas/9/2009           | 20                        | 160     | 1280 | 160   | 640  | 640   | 1280  | 640            | 04/26/13 | C1       |
| A/Indiana/9/2009         | 40                        | 640     | 5120 | 320   | 1280 | 1280  | 2560  | 640            | 04/23/13 | C1       |
| A/Minnesota/02/2009      | 80                        | 640     | 5120 | 640   | 2560 | 2560  | 5120  | 1280           | UNK      | C1       |
| A/Georgia/01/2009        | 80                        | 640     | 5120 | 320   | 1280 | 1280  | 2560  | 640            | 04/28/13 | E1       |
| A/South Carolina/09/2009 | 80                        | 640     | 5120 | 640   | 2560 | 2560  | 5120  | 1280           | 04/27/13 | C1       |
| A/Nebraska/02/2009       | 320                       | 1280    | 5120 | 1280  | 2560 | 2560  | 5120  | 1280           | UNK      | C1       |
| A/Colorado/03/2009       | 320                       | 640     | 5120 | 640   | 2560 | 2560  | 5120  | 1280           | 04/28/13 | C1       |
| A/Arizona/02/2009        | 160                       | 640     | 5120 | 640   | 1280 | 2560  | 2560  | 1280           | 04/27/13 | C1       |
| A/Delaware/02/2009       | 160                       | 640     | 5120 | 640   | 1280 | 2560  | 5120  | 1280           | 04/29/13 | E1       |
| A/Delaware/03/2009       | 320                       | 1280    | 5120 | 1280  | 2560 | 5120  | 5120  | 2560           | 04/29/13 | E1       |
| A/Mexico/4482/2009       | 320                       | 1280    | 5120 | 640   | 2560 | 2560  | 5120  | 2560           | 04/15/13 | E2       |
| A/Mexico/4486/2009       | 160                       | 1280    | 5120 | 1280  | 2560 | 2560  | 5120  | 1280           | 04/15/13 | C1       |
| A/Mexico/4486/2009       | 160                       | 1280    | 2560 | 640   | 1280 | 2560  | 5120  | 1280           | 04/15/13 | E2       |
| A/Mexico/4108/2009       | 320                       | 1280    | 5120 | 1280  | 2560 | 2560  | 5120  | 2560           | 04/04/13 | C1       |
| A/Mexico/4108/2009       | 80                        | 320     | 5120 | 320   | 1280 | 1280  | 2560  | 1280           | 04/04/13 | E1       |
| A/Mexico/3955/2009       | 160                       | 640     | 5120 | 640   | 2560 | 2560  | 5120  | 2560           | 04/04/13 | E2       |
| A/Mexico/4108/2009       | 160                       | 640     | 5120 | 320   | 2560 | 1280  | 5120  | 640            | 04/04/13 | C1/C1    |
| A/Mexico/4486/2009       | 160                       | 640     | 5120 | 640   | 1280 | 1280  | 2560  | 1280           | 04/15/13 | C1/C1    |
| A/Mexico/4516/2009       | 40                        | 640     | 2560 | 320   | 1280 | 2560  | 5120  | 1280           | 04/17/13 | C1/C1    |
| A/Mexico/4603/2009       | 80                        | 320     | 2560 | 320   | 1280 | 1280  | 2560  | 640            | 04/20/13 | E2       |
| A/Mexico/4595/2009       | 320                       | 640     | 5120 | 640   | 2560 | 2560  | 5120  | 2560           | 04/21/13 | C1/C1    |
| A/Mexico/4596/2009       | 160                       | 640     | 5120 | 640   | 2560 | 2560  | 5120  | 2560           | 04/21/13 | C1/C1    |
| A/Mexico/4627/2009       | 80                        | 640     | 2560 | 640   | 640  | 1280  | 5120  | 1280           | 04/21/13 | C1/C1    |
| A/Mexico/4635/2009       | 160                       | 640     | 5120 | 640   | 2560 | 2560  | 5120  | 1280           | 04/21/13 | C1/C1    |
| A/Mexico/4646/2009       | 160                       | 640     | 5120 | 320   | 1280 | 1280  | 5120  | 1280           | 04/21/13 | C1/C1    |
| A/Mexico/4176/2009       | 160                       | 640     | 2560 | 640   | 1280 | 1280  | 5120  | 1280           | 04/14/13 | C1/C1    |
| A/Mexico/4482/2009       | 320                       | 1280    | 5120 | 640   | 2560 | 2560  | 5120  | 2560           | 04/15/13 | C1       |
| A/Mexico/4603/2009       | 160                       | 640     | 5120 | 640   | 1280 | 1280  | 5120  | 1280           | 04/20/13 | C1/C1    |



**Table S6.** GenBank accession numbers of nucleotide sequences of swine influenza viruses used in genetic analyses shown in Fig. S2.

D00840, U03719, U03720, U11857, U80948, U80949, U80950, AB434288, AB434296, AB434304, AB434312, AB434320, AB434328, AB434384, AB434392, AB434400, AF091306, AF091307, AF091308, AF091314, AF091315, AF091316, AF091317, AF222026, AF222027, AF222028, AF222029, AF222030, AF222031, AF222032, AF222033, AF222034, AF222035, AF222036, AF320056, AF320057, AF320058, AF320059, AF320060, AF320061, AF320062, AF320063, AF320064, AF320065, AF320066, AF320067, AJ344002, AJ344003, AJ344004, AJ344008, AJ344009, AJ344011, AJ344015, AJ344016, AJ344017, AJ344018, AJ344019, AJ344020, AJ344021, AJ412708, AJ412711, AJ412712, AJ517816, AJ517817, AJ517818, AJ517819, AJ517820, AM490218, AM490219, AM490220, AM490221, AM490222, AM490223, AM503894, AM503895, AM503896, AM503897, AM920728, AY377929, AY590824, AY619961, AY790289, AY852271, CY009628, CY009892, CY009916, CY010572, CY010580, CY022029, CY022037, CY022045, CY022053, CY022061, CY022069, CY022101, CY022109, CY022117, CY022125, CY022133, CY022141, CY022269, CY022277, CY022285, CY022293, CY022301, CY022317, CY022325, CY022333, CY022341, CY022349, CY022357, CY022365, CY022373, CY022381, CY022389, CY022397, CY022405, CY022413, CY022421, CY022429, CY022437, CY022445, CY022453, CY022461, CY022469, CY022477, CY022954, CY022962, CY022970, CY022978, CY022986, CY022994, CY024933, CY024941, CY024942, CY024950, CY024954, CY024962, CY024970, CY024978, CY024986, CY024994, CY025002, CY025010, CY025205, CY025253, CY026283, CY026291, CY026299, CY026419, CY026427, CY026435, CY026443, CY026451, CY026459, CY026467, CY026475, CY026483, CY026491, CY027155, CY027291, CY027299, CY027307, CY027507, CY027515, CY027523, CY028171, CY028179, CY028187, CY028427, CY028435, CY028780, CY028788, CY030735, CY032213, CY032929, CY035070, CY036799, CY036863, CY037898, CY037906, CY037914, CY037922, CY037929, CY037936, CY037944, CY037952, CY037960, CY037967, CY037975, CY037983, CY037991, CY037999, CY038007, CY038015, CY038023, CY039917, CY039925, D00837, D28518, DQ058215, DQ280195, DQ280203, DQ280219, DQ280243, DQ280250, EU004444, EU004452, EU139823, EU139824, EU139825, EU139826, EU139827, EU139829, EU139832, EU163946, EU163947, EU296599, EU296601, EU296603, EU296605, EU409948, EU409955, EU409960, EU409964, EU409968, EU502884, EU502885, EU604689, EU798778, EU798779, FJ415610, FJ638298, FJ638306, FJ688266, FJ798777, FJ805962, GQ150328, K00992, L09063, M81707, S67220, U04857, U04858, U04859, U11703, U11858, U44482, U45451, U45452, U46020, U46783, U46942, U46943, U47304, U47305, U47306, U72666, U72667, U72668, U72669, X57491, X57492, X57493, X57494, AB294217, AB434336, AB434408, AB434416, AB441170, AF085413, AF085414, AF085415, AF085416, AF085417, AF250124, AF455675, AF455676, AF455677, AF455678, AF455679, AF455680, AF455681, AF455682, AJ344005, AJ344006, AJ344007, AJ344010, AJ344012, AJ344013, AJ412709, AJ412710, AM490224, AM503547, AM503898, AM503899, AM503900, AM503901, AM503902, AM503903, AM920737, AY052778, AY060030, AY060031, AY060032, AY060033, AY060034, AY060035, AY060036, AY060037, AY060038, AY060039, AY060040, AY060041, AY060042, AY060043, AY060044, AY060045, AY060046, AY060047, AY060048, AY060049, AY060050, AY060051, AY060052, AY129156, AY377936, AY590822, AY590823, D29656, D29657, DQ139320, DQ280212, DQ280227, DQ280236, DQ431990, DQ447187, DQ666925, DQ666933, DQ666941, DQ666944, EF556199, EF556201, EF556203, EU053133, EU053141, EU053148, EU139828, EU139830, EU139831, EU296607, EU798780, EU798781, EU798782, EU798783, EU798784, EU798785, EU798786, EU798787, EU798788, FJ374511, FJ638314, U85986, AB434290, AB434298, AB434306, AB434314, AB434322, AB434330, AB434336, AB434344, AB434402, AF250363, AF250364, AF250365, AF410875, AJ410876, AJ410877, AJ410878, AJ410879, AJ410880, AJ410881, AJ410882, AJ410883, AJ410884, AJ412689, AJ412690, AJ412691, AJ412692, AM920729, AY619960, AY790269, AY790291, CY009630, CY009894, CY009918, CY010574, CY010582, CY022031, CY022039, CY022047, CY022055, CY022063, CY022071, CY022103, CY022111, CY022119, CY022127, CY022135, CY022143, CY022271, CY022279, CY022287, CY022295, CY022303, CY022319, CY022327, CY022335, CY022343, CY022351, CY022359, CY022367, CY022375, CY022383, CY022391, CY022399, CY022407, CY022415, CY022423, CY022431, CY022439, CY022447, CY022455, CY022463, CY022471, CY022479, CY022956, CY022964, CY022972, CY022980, CY022988, CY022996, CY024935, CY024944, CY024952, CY024956, CY024964, CY024972, CY024980, CY024988, CY024996, CY025004, CY025012, CY025059, CY025207, CY025255, CY026285, CY026293, CY026301, CY026421, CY026429, CY026437, CY026445, CY026453, CY026461, CY026469, CY026477, CY026485, CY026493, CY027157, CY027293, CY027301, CY027309, CY027509, CY027517, CY027525, CY028173, CY028181, CY028189, CY028429, CY028437, CY028782, CY028790, CY030737, CY032215, CY032931, CY035072, CY036801, CY036865, CY037900, CY037908, CY037916, CY037931, CY037938, CY037946, CY037954, CY037962, CY037969, CY037977, CY037985, CY037993, CY038001, CY038009, CY038017, CY038025, CY039919, CY039927, D31947, DQ280194, DQ280202, DQ280218, DQ280242, DQ280251, DQ280259, EU004442, EU004450, EU045388, EU045389, EU045393, EU139833, EU139834, EU139835, EU139836, EU139837, EU139839, EU139842, EU296600, EU296602, EU296604, EU296606, EU409949, EU409956, EU409961, EU409965, EU409969, EU502888, EU604690, EU798818, EU798819, FJ415611, FJ638300, FJ638308, FJ688267, FJ798780, FJ805963, GQ150330, U86144, U86145, DQ145538, DQ150427, DQ150435, DQ447185, DQ923508, DQ923509, EU037015, AY646425, AY747610, AY747618, DQ432038, DQ432046, DQ997077, DQ997254, DQ997263, DQ997385, AB434289, AB434297, AB434305, AB434313, AB434321, AB434329, AB434337, AB434345, AB434353, AB434361, AB434369, AB434377, AB434385, AB434393, AB434401, AB434409, AB434417, AB441173, AF222768, AF222769, AF222770, AF222771, AF222772, AF222773, AF222774, AF222775, AF222776, AF222777, AF222778, AF222814, AF222815, AF225534, AF225535, AF225536, AF225537, AF250127, AF251392, AF251399, AF251407, AF251415, AF251423, AF251431, AF285888, AF385293, AF397198, AF397199, AF400755, AF400757, AF455699, AF455700, AF455701, AF455702, AF455703, AF455704, AF455705, AF455706, AF293942, AJ293942, AJ307062, AJ307063, AJ307064, AJ307065, AJ307066, AJ307067, AJ307068, AJ307069, AJ307071, AJ307073, AJ307074, AJ311510, AM746619, AM920725, AM920730, AM920735, AM920739, AM920744, AY129159, AY363527, AY363528, AY363529, AY363530, AY363531, AY363532, AY363533, AY363534, AY363535, AY363536, AY363537, AY363538, AY363539, AY363540, AY363541, AY363542, AY363543, AY363544, AY619958, AY619960, AY619974, AY623833, AY623834, AY623835, AY623836, AY646426, AY747611, AY747619, AY790308, CY009303, CY009311, CY009375, CY009383, CY009631, CY009895, CY009919, CY010567, CY010575, CY010583, CY020504, CY022032, CY022040, CY022048, CY022056, CY022064, CY022072, CY022104, CY022112, CY022120, CY022128, CY022136, CY022144, CY022272, CY022280, CY022288, CY022296, CY022304, CY022320, CY022328, CY022336, CY022344, CY022352, CY022360, CY022368, CY022376, CY022384, CY022392, CY022400,







CY022403, CY022411, CY022419, CY022427, CY022435, CY022443, CY022451, CY022459, CY022467, CY022475,  
 CY022483, CY022960, CY022968, CY022976, CY022984, CY022992, CY023000, CY024939, CY024948, CY024960,  
 CY024968, CY024976, CY024984, CY025000, CY025008, CY025016, CY025063, CY025067, CY025068, CY025211,  
 CY025259, CY026289, CY026297, CY026305, CY026425, CY026433, CY026441, CY026449, CY026457, CY026465,  
 CY026473, CY026481, CY026489, CY026497, CY027161, CY027297, CY027305, CY027313, CY027513, CY027521,  
 CY027529, CY028177, CY028185, CY028193, CY028433, CY028441, CY028786, CY028794, CY030741, CY032219,  
 CY032935, CY035076, CY035415, CY035424, CY035428, CY035431, CY035434, CY035437, CY035440, CY035446,  
 CY036805, CY036898, CY037896, CY037904, CY037912, CY037920, CY037927, CY037934, CY037942, CY037950,  
 CY037958, CY037973, CY037981, CY037989, CY037997, CY038005, CY038013, CY038021, CY039923, CY039931,  
 DQ139327, DQ145544, DQ150423, DQ150431, DQ280190, DQ280198, DQ280206, DQ280214, DQ280222, DQ280230,  
 DQ280238, DQ280246, DQ280253, DQ280256, DQ280257, DQ280260, DQ432040, DQ432048, DQ469964, DQ469972,  
 DQ469980, DQ469988, DQ836168, DQ836169, DQ836170, DQ836171, DQ836172, DQ836173, DQ836174, DQ836175,  
 DQ836176, DQ836177, DQ836178, DQ836179, DQ923518, DQ923519, DQ981536, DQ981544, DQ981560, DQ981584,  
 DQ997082, DQ997251, DQ997260, DQ997389, DQ997417, DQ997426, DQ997434, EF455568, EF551051, EF612748,  
 EU004446, EU004454, EU015992, EU053131, EU053139, EU086314, EU086330, EU086331, EU116037, EU258941,  
 EU258949, EU273798, EU273800, EU273801, EU301400, EU409945, EU409954, EU409959, EU502891,  
 EU502899, EU502907, EU516310, EU516318, EU604692, EU620726, EU620734, EU620742, EU655694, EU692890,  
 EU692891, EU692892, EU692893, EU692894, EU692895, EU692896, EU692897, EU692898, EU692899, EU692900,  
 EU692901, EU692902, EU692903, EU692904, EU692905, EU692906, EU692907, EU798898, EU798899, EU798900,  
 EU798901, EU798902, EU798903, EU798904, EU798905, EU798906, EU798907, EU798908, EU798909, EU798910,  
 EU798911, EU798912, EU798913, EU798914, EU798915, EU798916, EU798917, EU826549, EU924269, FJ200418,  
 FJ200426, FJ374513, FJ415614, FJ461604, FJ461605, FJ561058, FJ638296, FJ638304, FJ638312, FJ798776, FJ798784,  
 FJ830853, FJ970925, GQ150326, M25927, M25930, M25931, M55472, AB434285, AB434293, AB434301, AB434309,  
 AB434317, AB434325, AB434333, AB434341, AB434349, AB434357, AB434365, AB434373, AB434381, AB434389,  
 AB434397, AB434405, AB434413, AB441177, AF153240, AF153241, AF153242, AF153243, AF222816, AF222817,  
 AF225514, AF225515, AF225516, AF225517, AF250131, AF251394, AF251402, AF251410, AF251418, AF251426,  
 AF251434, AF285892, AF400761, AF400762, AF400763, AF455731, AF455732, AF455733, AF455734, AF455735,  
 AF455736, AF455737, AF455738, AJ306841, AJ306842, AJ306843, AJ306844, AJ306845, AJ306846, AJ306848, AJ306849,  
 AJ306850, AJ306851, AJ306854, AJ306855, AJ311457, AJ311458, AJ311459, AY129163, AY363455, AY363456, AY363457,  
 AY363458, AY363459, AY363460, AY363461, AY363462, AY363463, AY363464, AY363465, AY363466, AY363467,  
 AY363468, AY363469, AY363470, AY363471, AY363472, AY619954, AY619962, AY619970, AY700215, AY747616,  
 AY747624, AY790274, AY790282, AY790288, AY790296, AY790304, AY790311, AY790319, CY009307, CY009315,  
 CY009379, CY009387, CY009635, CY009899, CY009923, CY010571, CY010579, CY010587, CY020508, CY022036,  
 CY022044, CY022052, CY022060, CY022068, CY022076, CY022108, CY022116, CY022124, CY022132, CY022140,  
 CY022148, CY022276, CY022284, CY022292, CY022300, CY022308, CY022324, CY022332, CY022340, CY022348,  
 CY022356, CY022364, CY022372, CY022380, CY022388, CY022396, CY022404, CY022412, CY022420, CY022428,  
 CY022436, CY022444, CY022452, CY022460, CY022468, CY022476, CY022484, CY022961, CY022969, CY022977,  
 CY022985, CY022993, CY023001, CY024940, CY024949, CY024961, CY024969, CY024977, CY024985, CY024993,  
 CY025001, CY025009, CY025017, CY025064, CY025068, CY025212, CY025260, CY026290, CY026298, CY026306,  
 CY026426, CY026434, CY026442, CY026450, CY026458, CY026466, CY026474, CY026482, CY026490, CY026498,  
 CY027162, CY027298, CY027306, CY027314, CY027514, CY027522, CY027530, CY028178, CY028186, CY028194,  
 CY028434, CY028442, CY028787, CY028795, CY030742, CY032220, CY032936, CY035077, CY035414, CY035417,  
 CY035420, CY035423, CY035427, CY035430, CY035433, CY035436, CY035439, CY035443, CY035445, CY036806,  
 CY036870, CY037895, CY037903, CY037911, CY037919, CY037926, CY037941, CY037949, CY037957, CY037965,  
 CY037972, CY037980, CY037988, CY037996, CY038004, CY038012, CY038020, CY039924, CY039932, DQ139325,  
 DQ145540, DQ150422, DQ150430, DQ280189, DQ280197, DQ280205, DQ280213, DQ280221, DQ280229, DQ280237,  
 DQ280245, DQ432039, DQ432047, DQ469963, DQ469971, DQ469979, DQ469987, DQ923520, DQ923521, DQ981535,  
 DQ981559, DQ981567, DQ981575, DQ981607, DQ981615, DQ981623, DQ997083, DQ997252, DQ997261, DQ997390,  
 DQ997418, DQ997427, DQ997435, EF455569, EF551050, EF612749, EU004447, EU004455, EU015993, EU053130,  
 EU053138, EU053146, EU086316, EU086332, EU086333, EU116038, EU258942, EU258950, EU273802, EU273803,  
 EU273804, EU273805, EU301177, EU409946, EU409953, EU409958, EU409963, EU409967, EU502892, EU502898,  
 EU502906, EU516309, EU516317, EU604691, EU620725, EU620733, EU620741, EU655695, EU798918, EU798919,  
 EU798920, EU798921, EU798922, EU798923, EU798924, EU798925, EU798926, EU798927, EU798928, EU798929,  
 EU798930, EU798931, EU798932, EU798933, EU798934, EU798935, EU798936, EU798937, EU826550, EU924268,  
 FJ200417, FJ200425, FJ374512, FJ415615, FJ461606, FJ461607, FJ561057, FJ638295, FJ638303, FJ638311, FJ798770,  
 FJ798778, FJ830852, FJ970926, GQ150325, M55469, M55470, M55471, M73513, M73515

**Fig. S1.** Phylogenetic trees for each sequenced gene of outbreak strains as of 16 May 2009, and selected other strains. Sequences were chosen, from among all avian, swine, and human influenza sequences in GenBank to be representative of the relevant lineages. Trees made from all swine relevant swine sequences are shown in Fig S2. Lineage labels to the right of the trees indicate to the lineage to which the gene segment belongs. Nucleotide sequences of each gene segment were aligned using Mafft (available from <http://www.ebi.ac.uk/mafft/>). MODELTEST was run on the aligned sequences and GTR+I+ $\Gamma$ 4 was determined to be the most appropriate evolutionary model for phylogenetic tree construction. Initial tree construction was performed using PhyML v2.4.5 under the GTR+I+ $\Gamma$ 4 model. Global optimization of branch topology was then performed on the tree with the best likelihood score from PhyML using Garli v0.96b8 under the model parameters determined by MODELTEST. Garli was run for 300,000 generations. **A.** PB2, **B.** PB1, **C.** PA, **D.** HA, **E.** NP, **F.** NA, **G.** M, **H.** NS.

Fig. S1A PB2

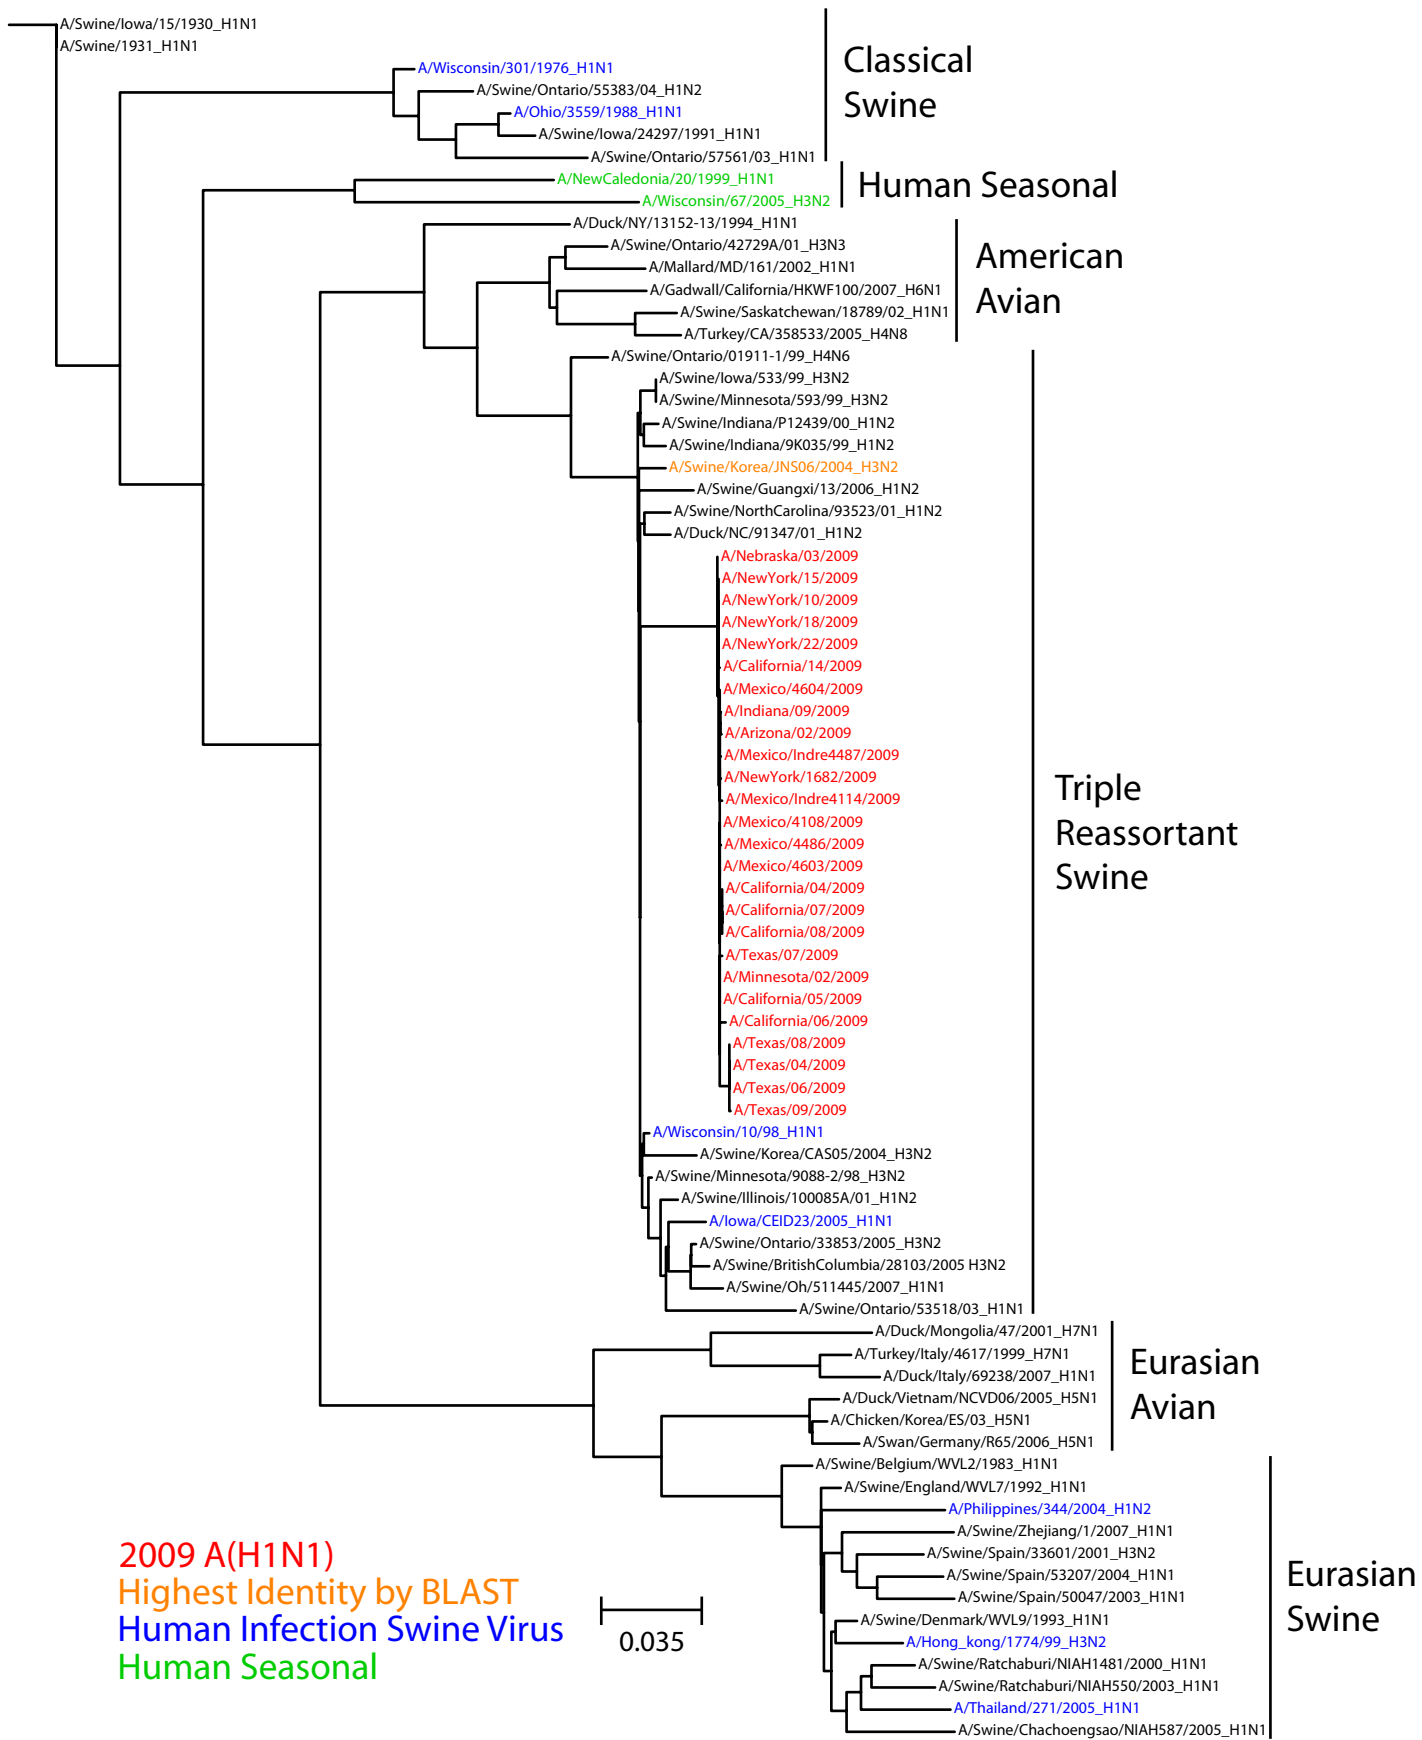

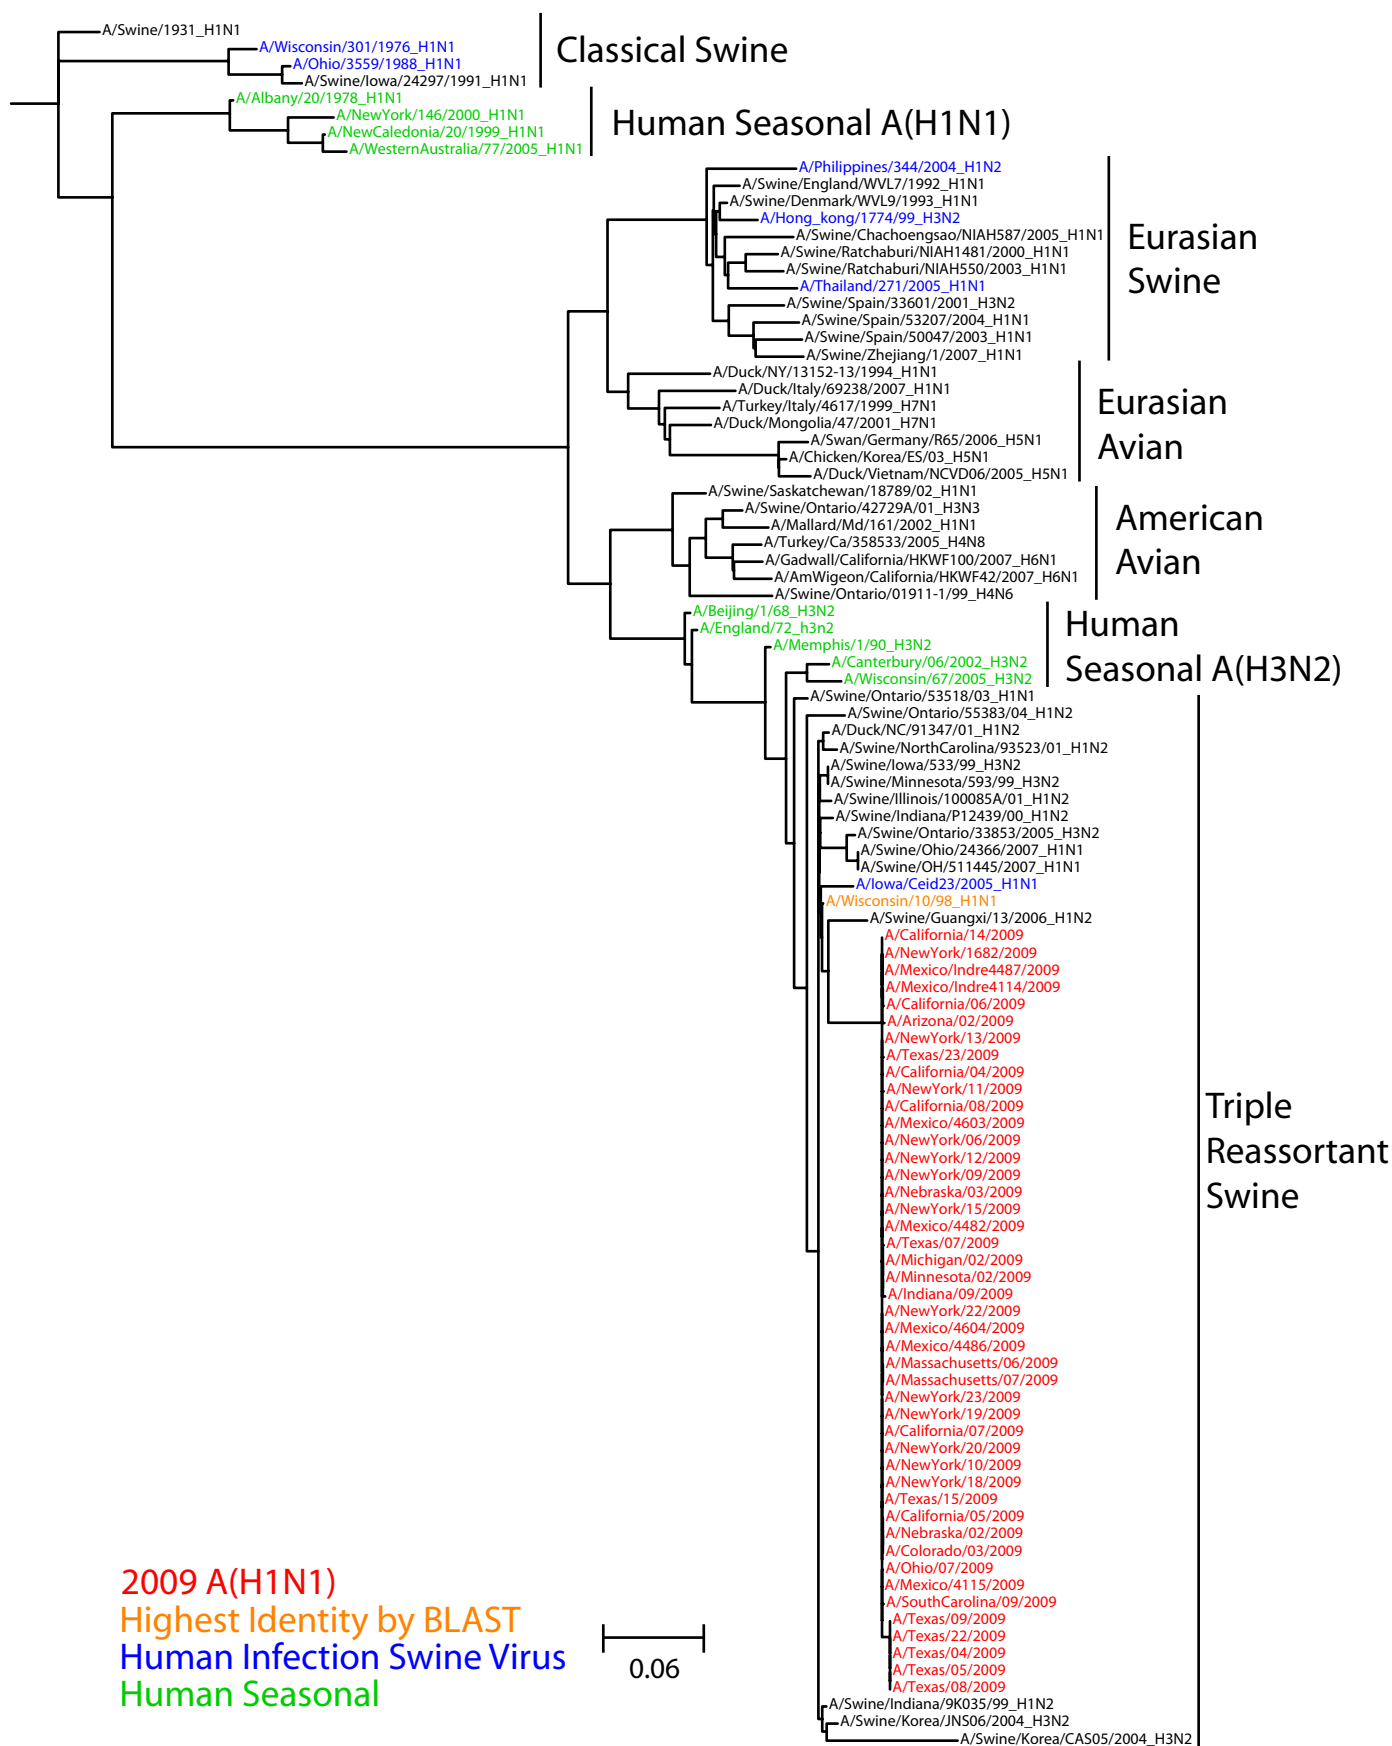

Fig.S1C PA

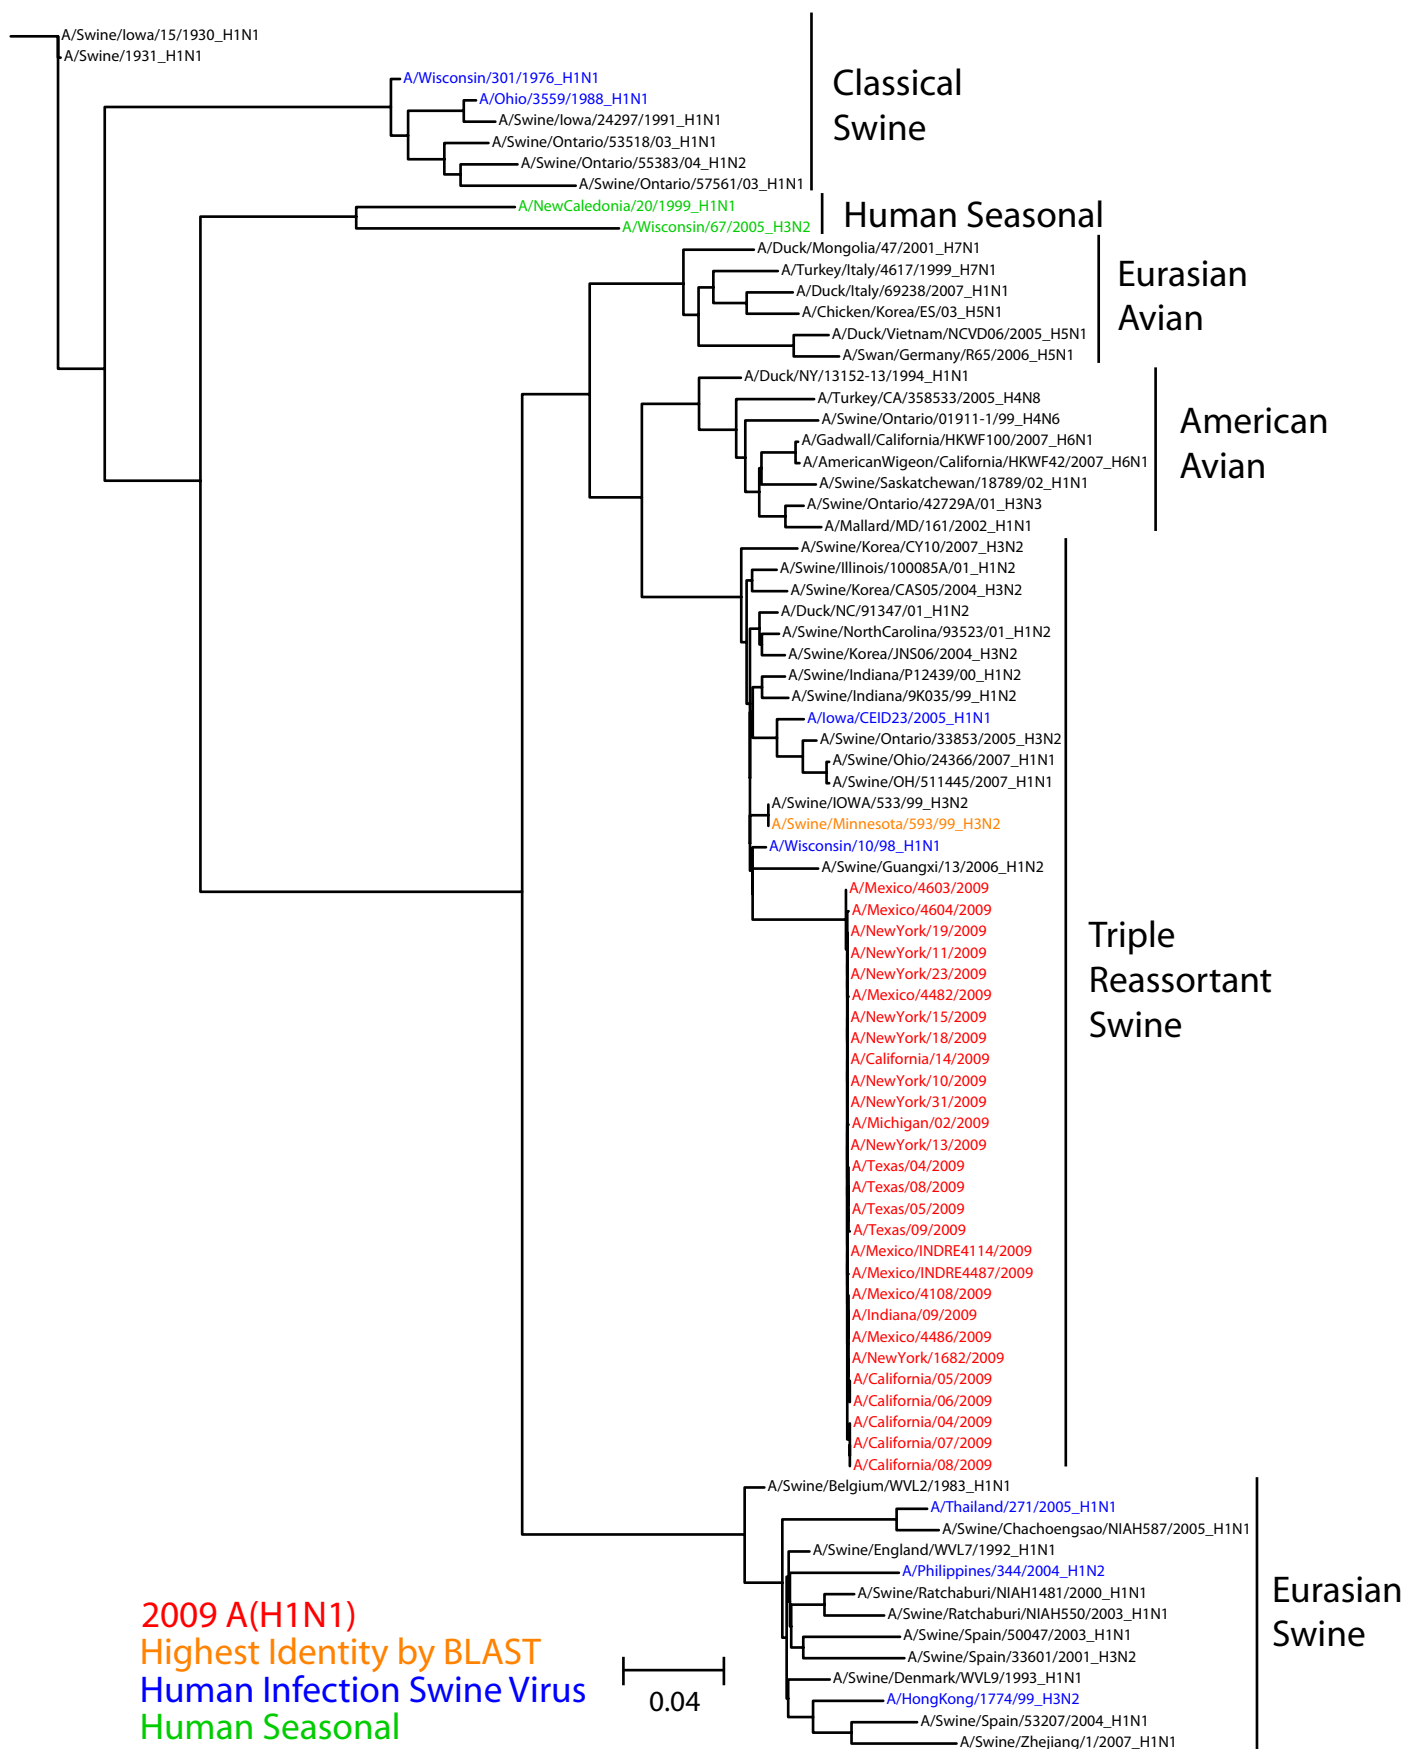

Fig.S1D HA

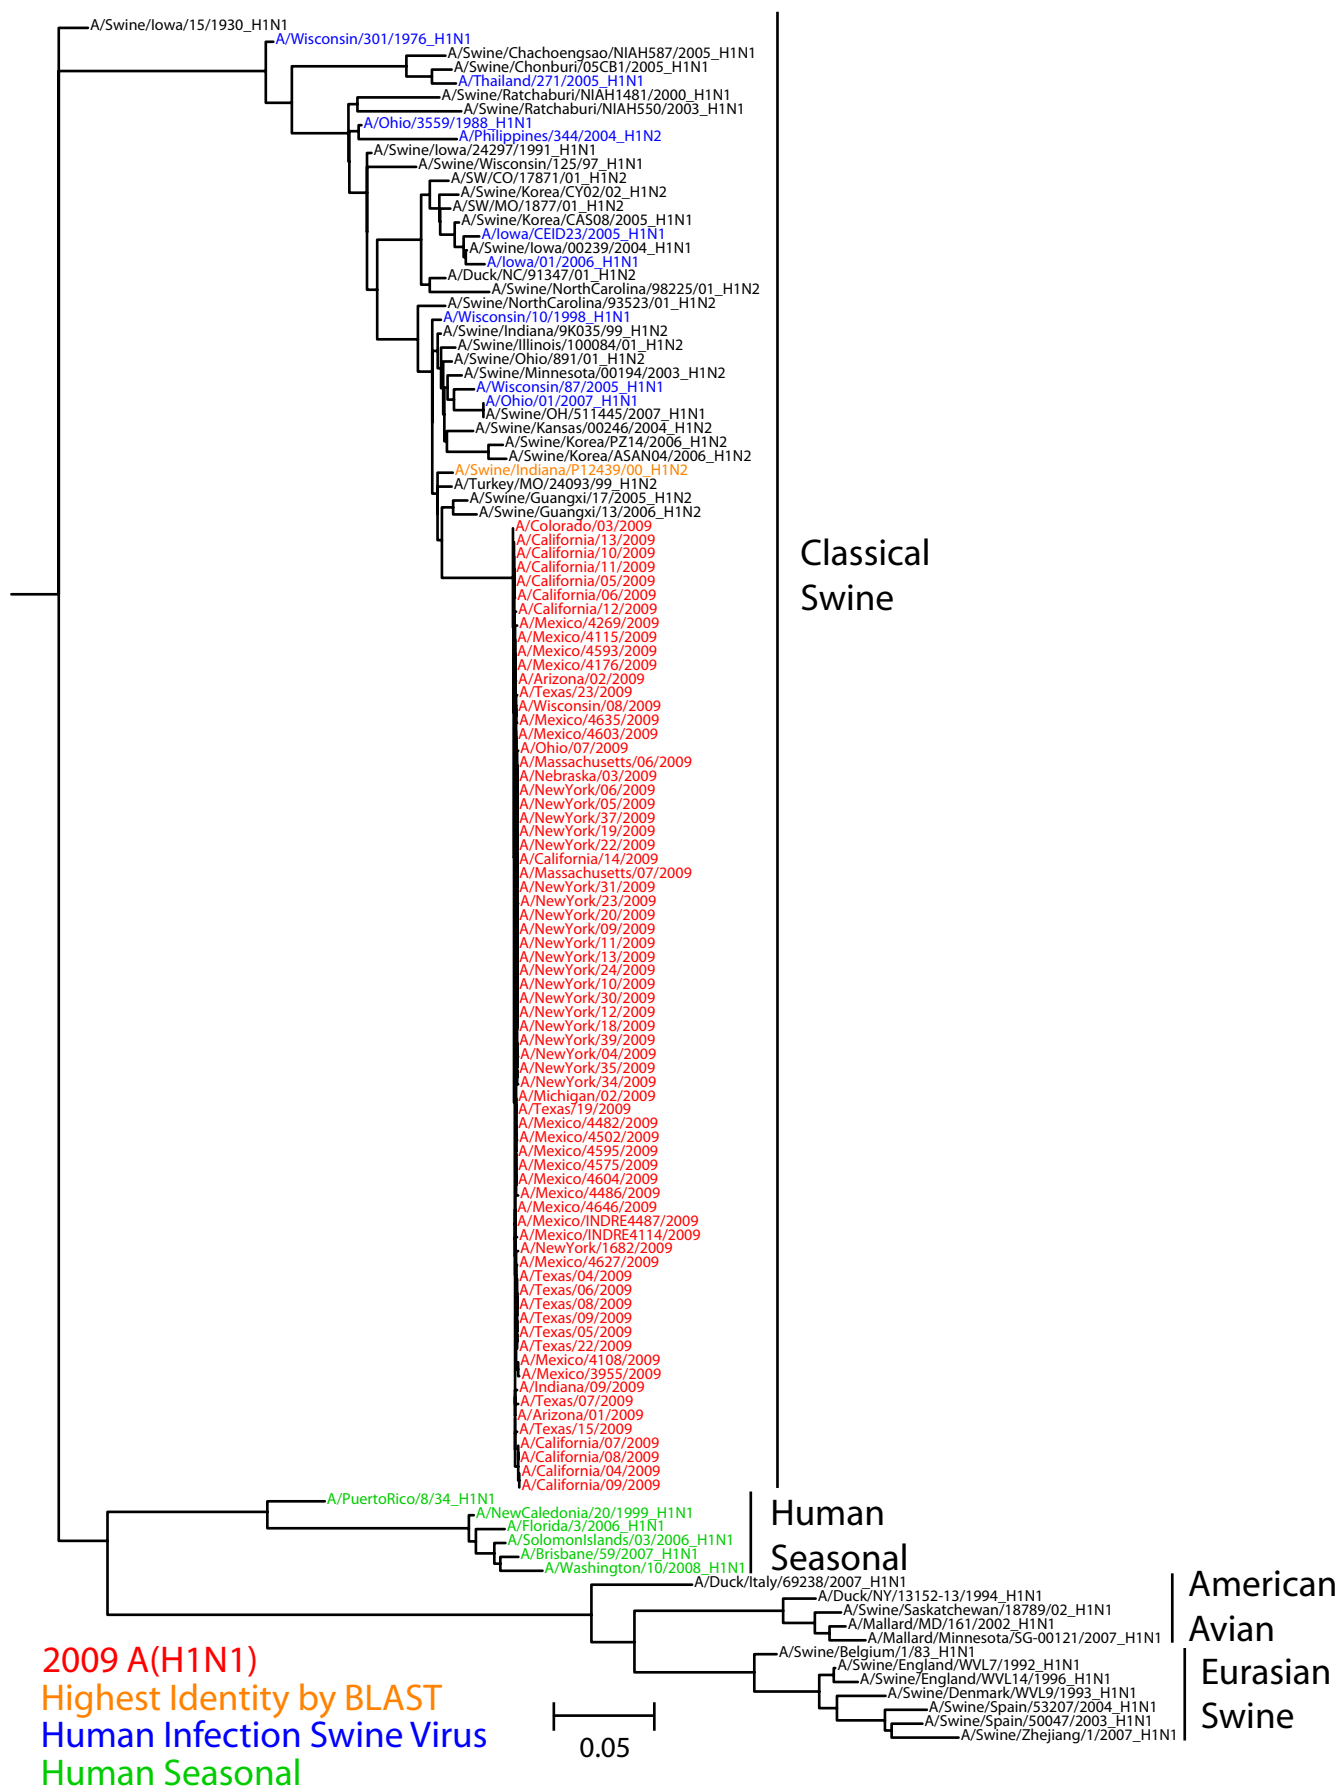

Fig.S1E NP

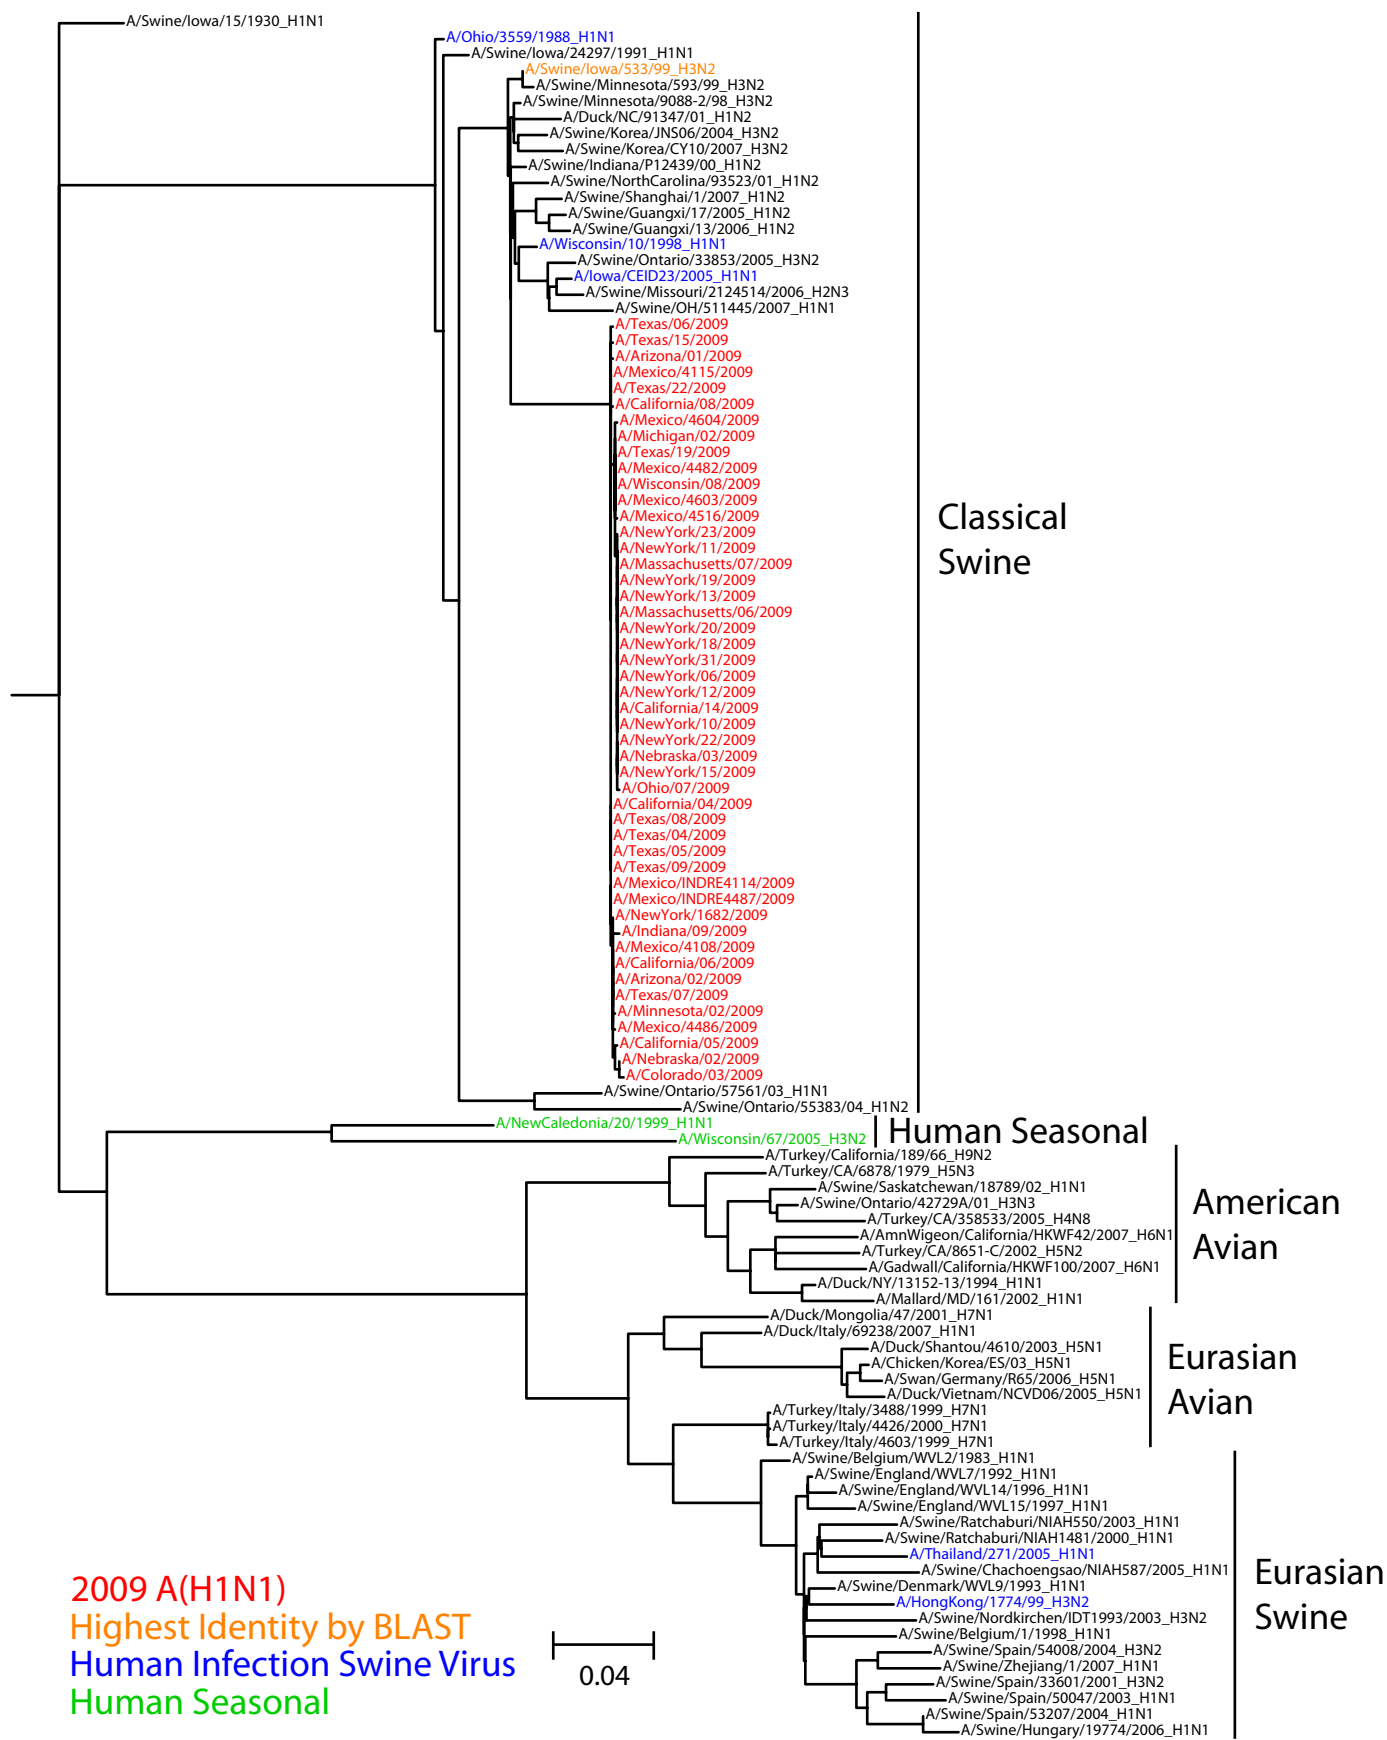



Fig.S1F NA

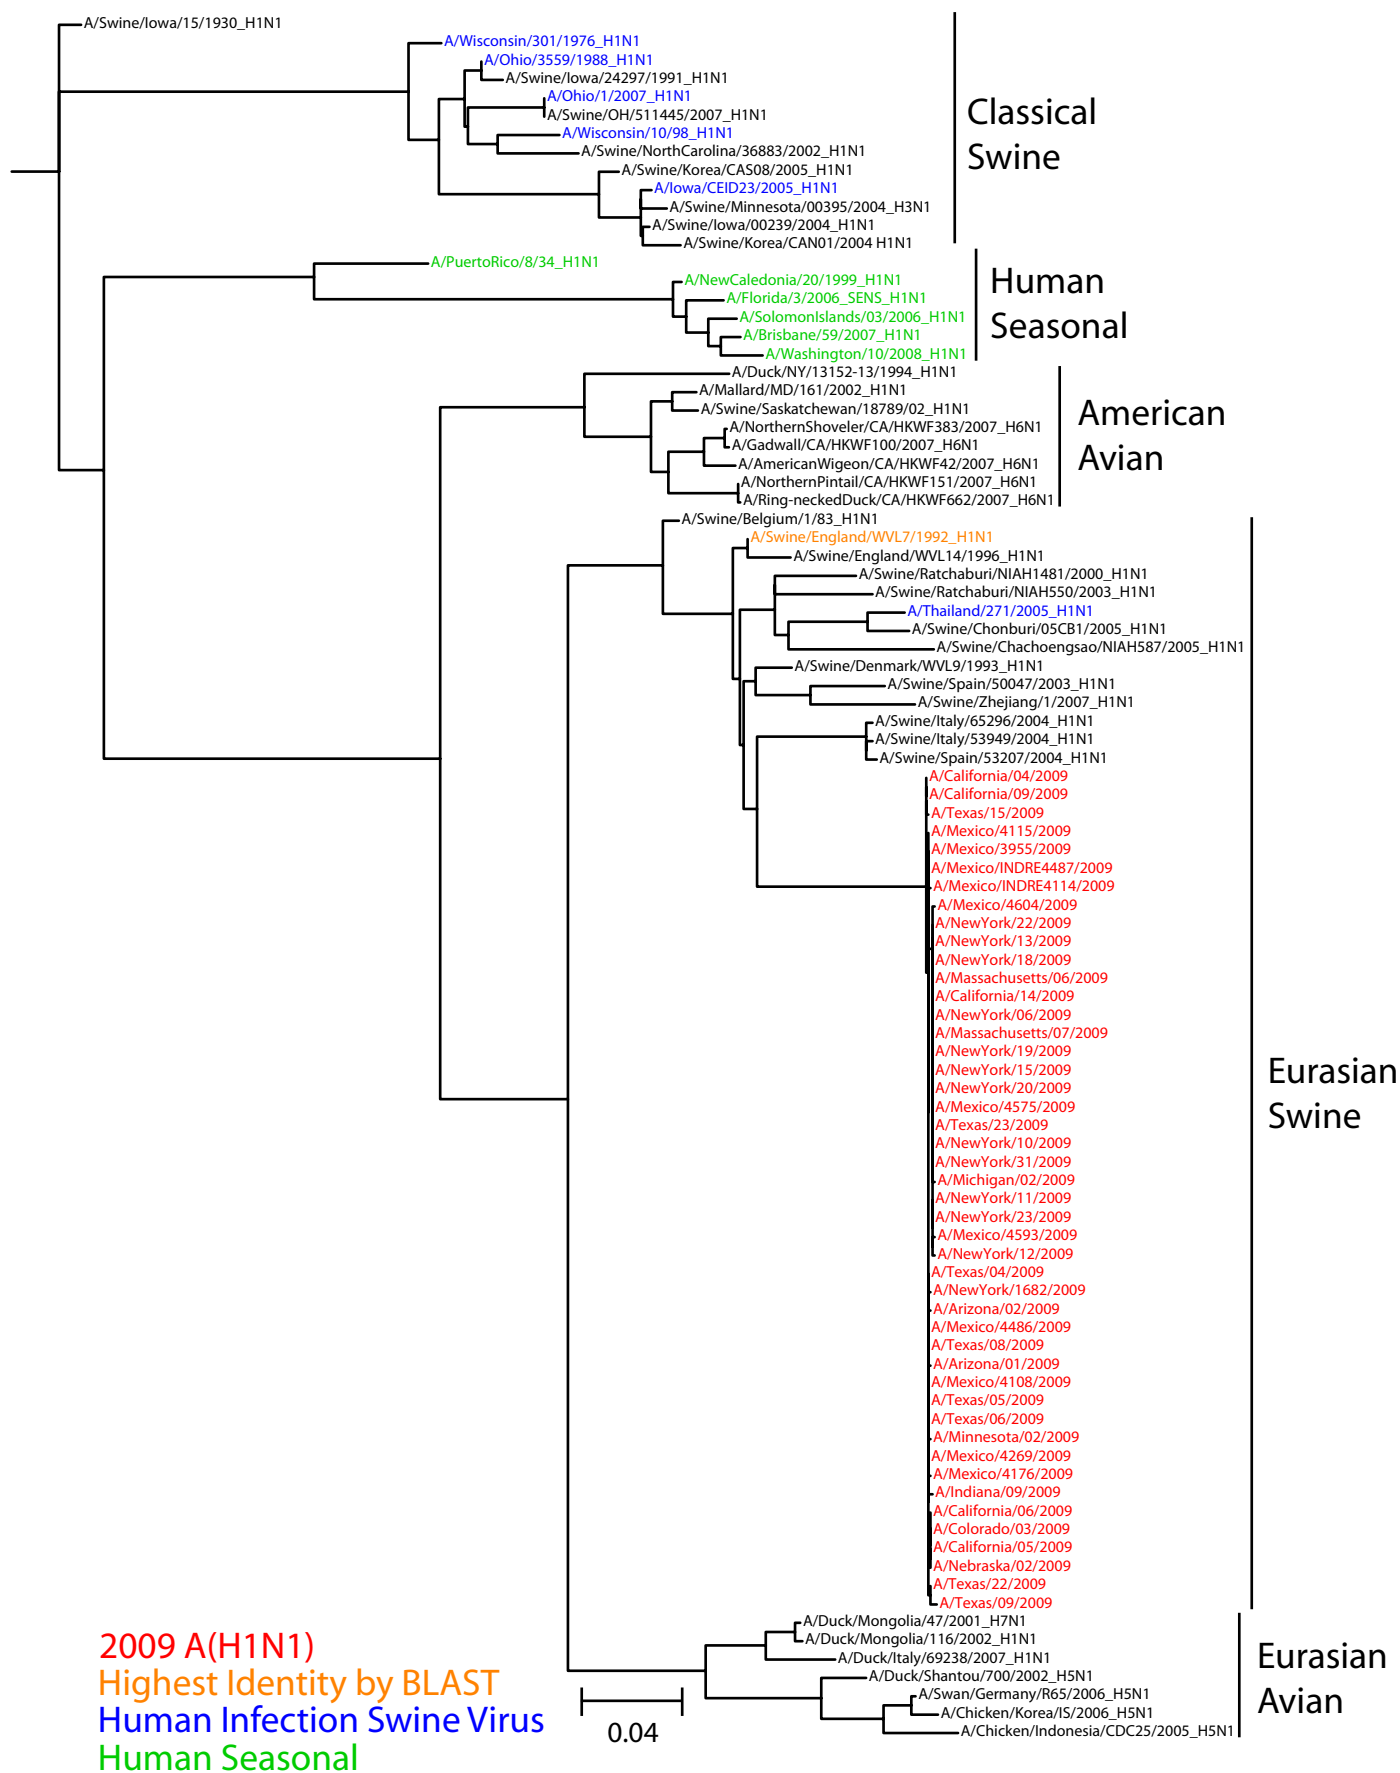

Fig. S1G M

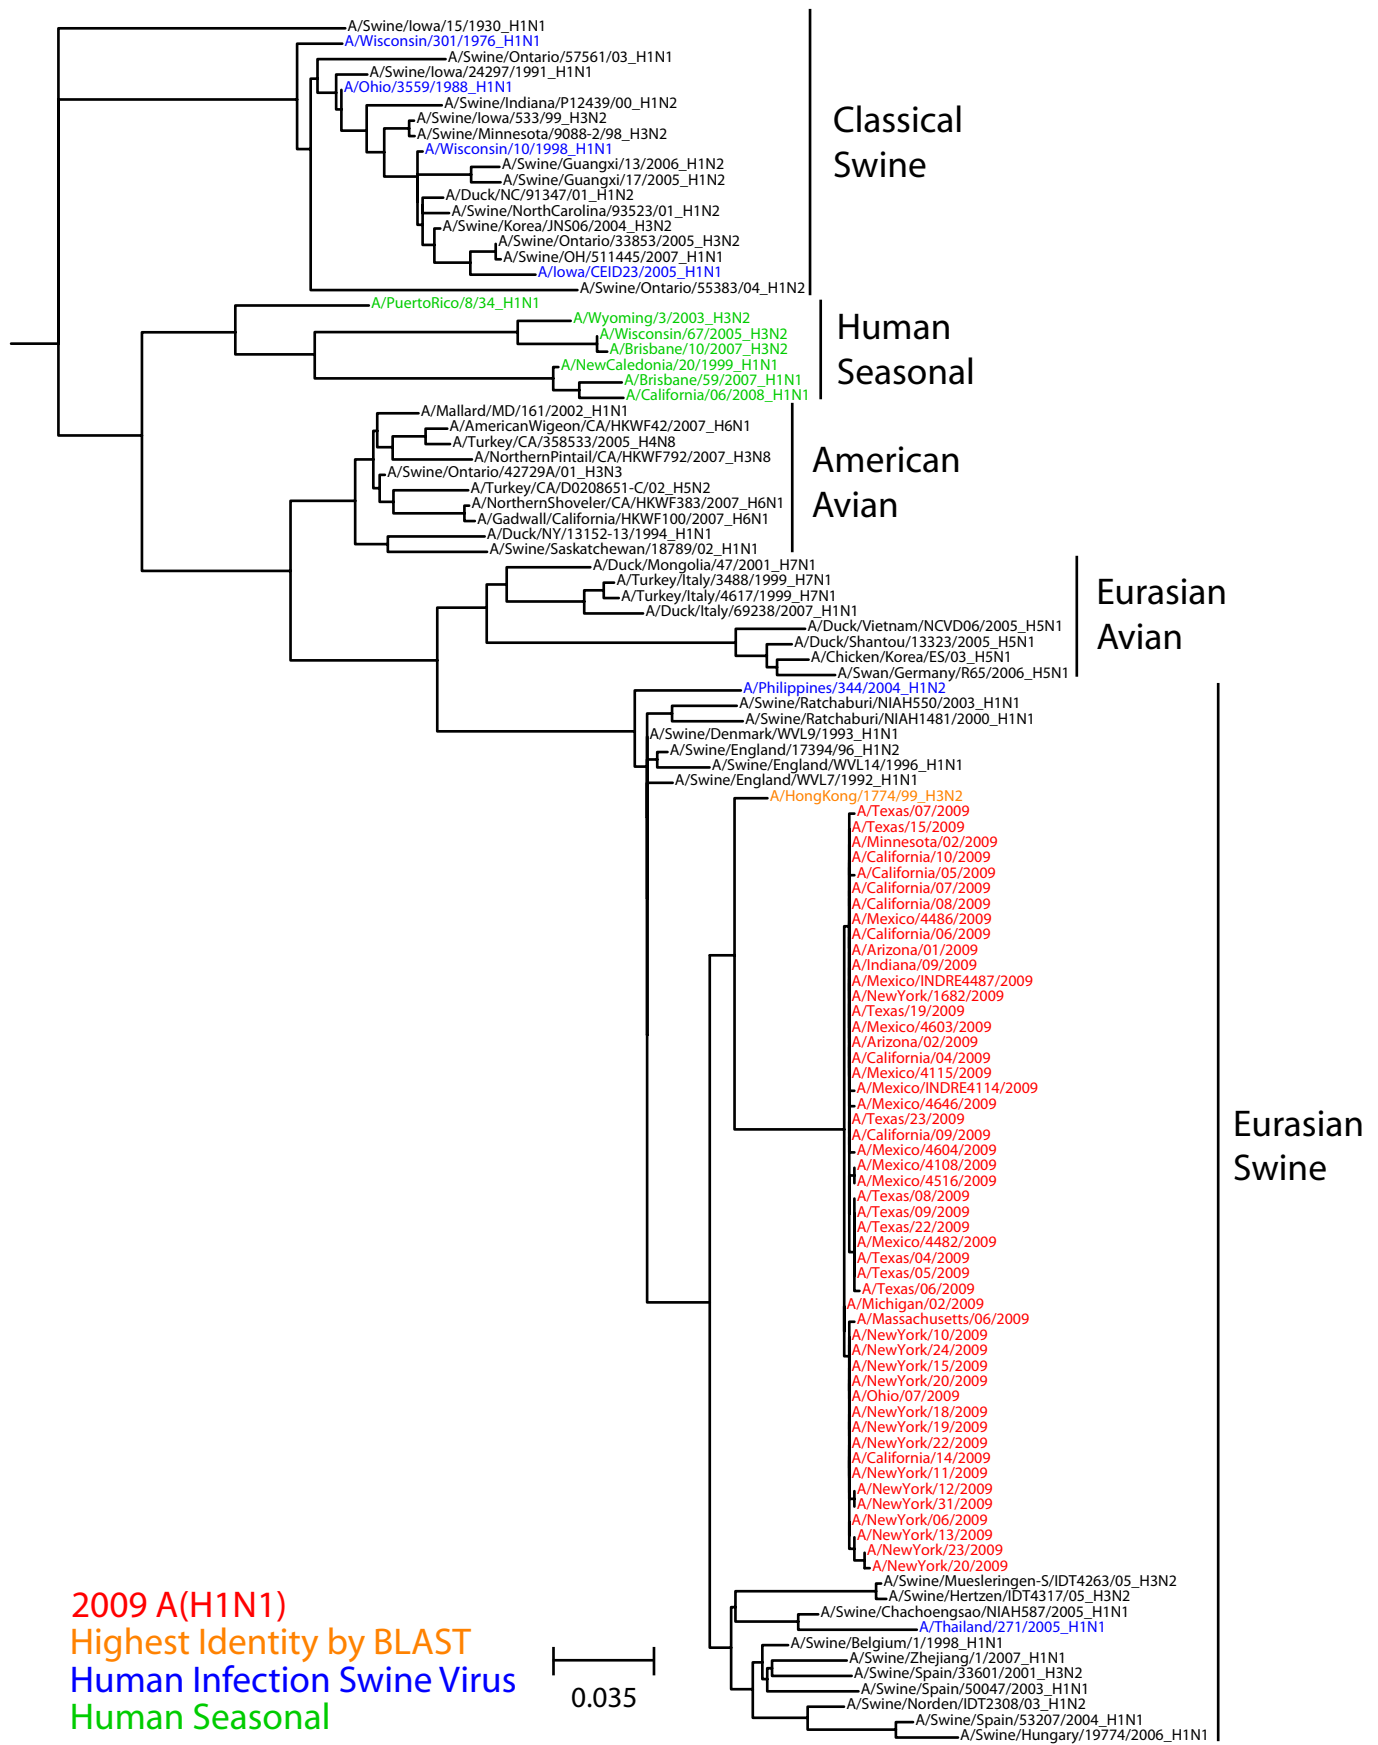

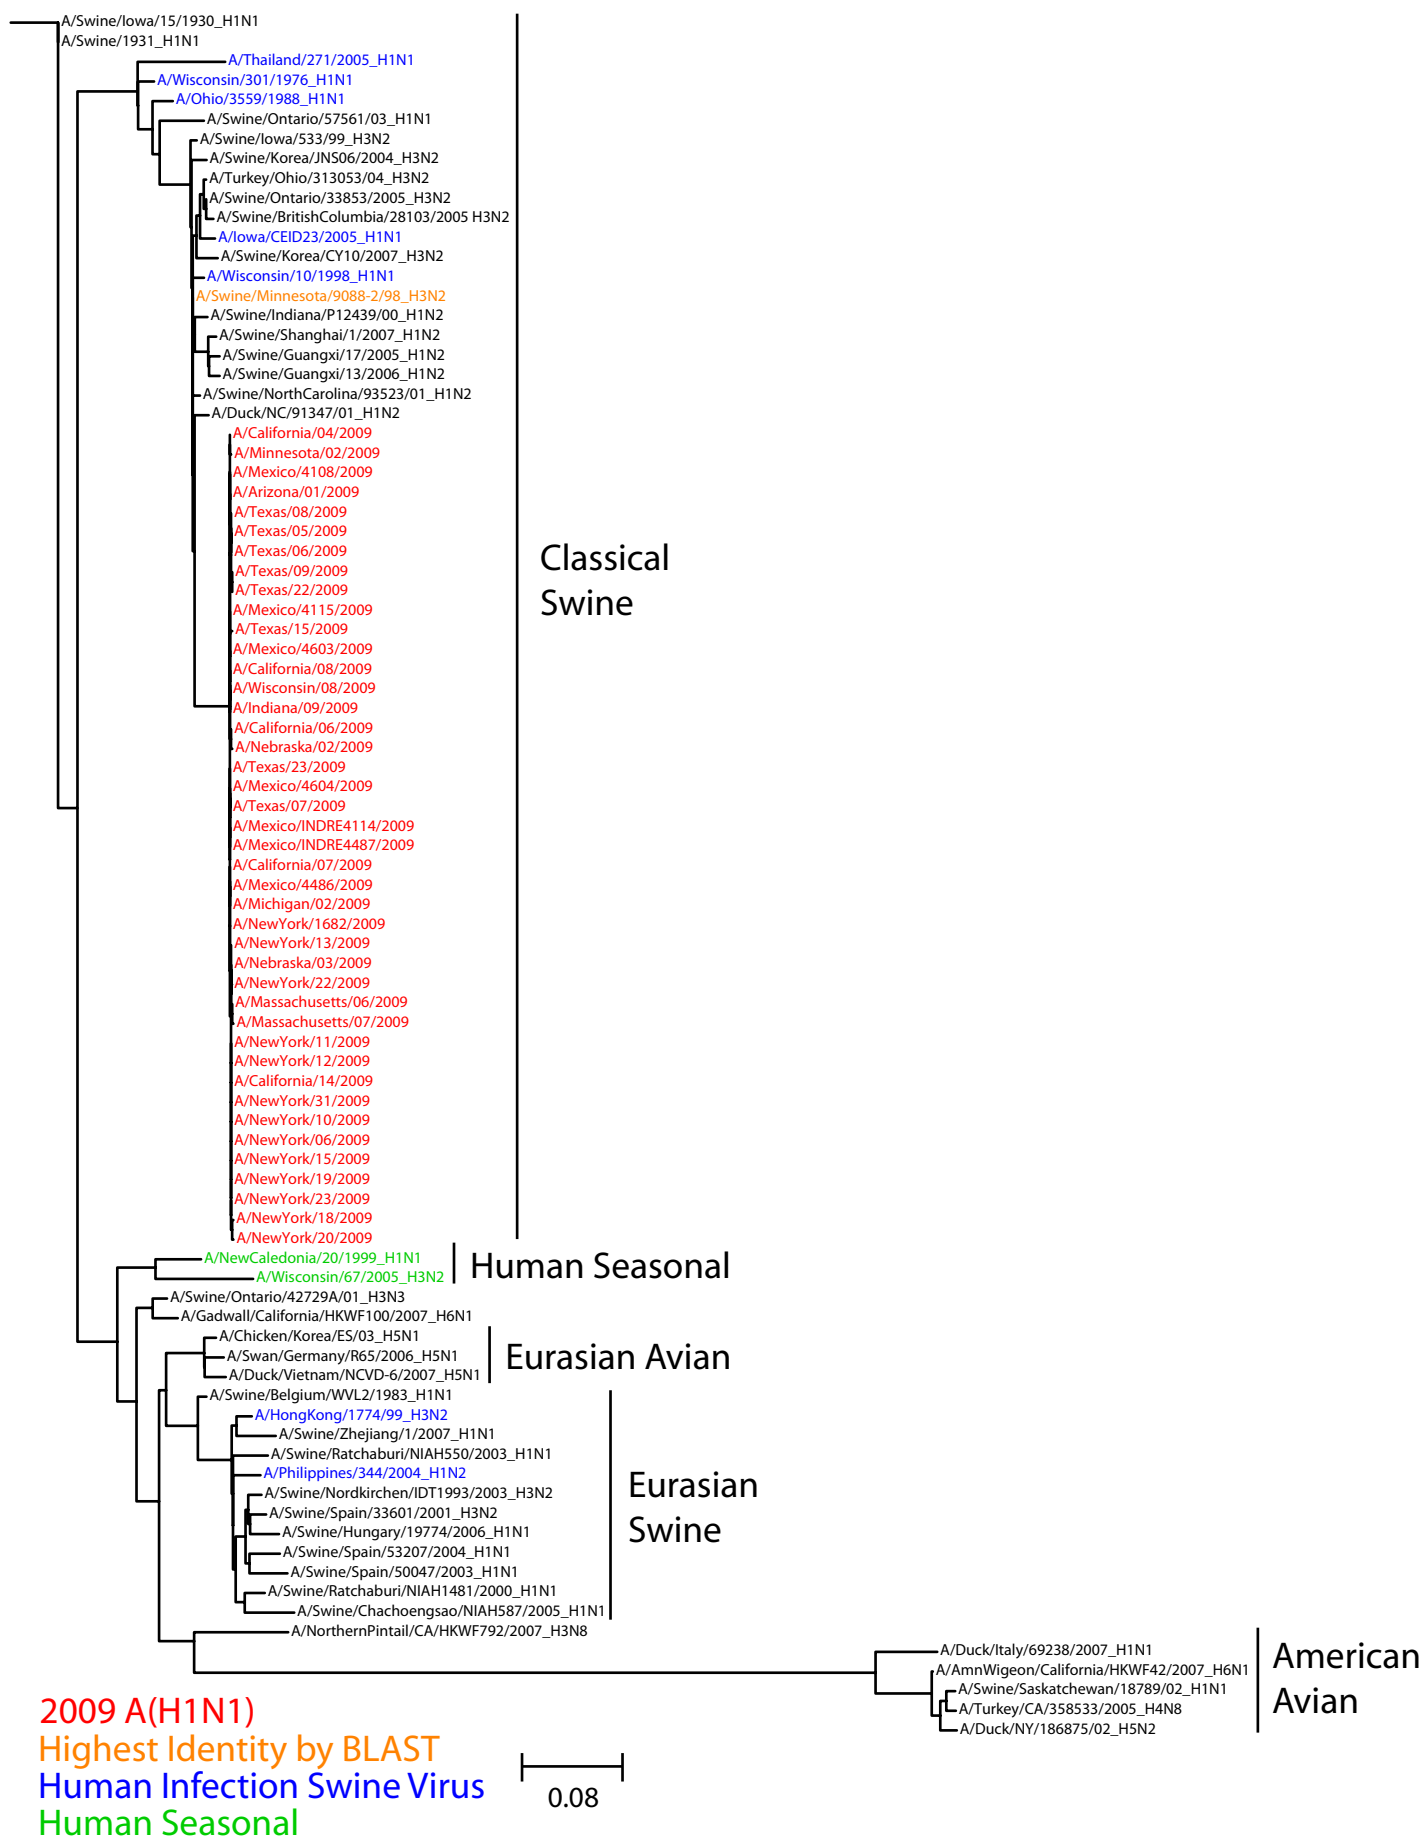

**Fig. S2.** Phylogenetic trees for each gene segment of the 2009 A(H1N1) strains as of 17 May 2009, and all relevant swine sequences (HA all swine H1 sequences longer than 900 base pairs (bp), NA all swine N1 sequences longer than 900 bp, other gene segments all swine viruses (PB2, PB1 and PA longer than 1000 bp; NP longer than 900 bp; M longer than 800 bp; NS longer than 700 bp) in GenBank. 2009 A(H1N1) strains show in red. Nucleotide sequences of each segment were aligned using Mafft (available from <http://www.ebi.ac.uk/mafft/>). MODELTEST was run on the aligned sequences and GTR+I+ $\Gamma$ 4 was determined to be the most appropriate evolutionary model for phylogenetic tree construction. Initial tree construction was performed using PhyML v2.4.5 under the GTR+I+ $\Gamma$ 4 model. Global optimization of branch topology was then performed on the tree with the best likelihood score from PhyML using Garli v0.96b8 under the model parameters determined by MODELTEST. Garli was run for 300,000 generations. At least 52 branches in the Classical Swine and Triple Reassortant Lineages of the trees of the 8 gene segments are approximately as long or longer than the branch to the 2009 A(H1N1) strains (shown in red) for each segment (PB2 7 branches, PB1 5, PA 5, HA 9, NP 6, M 6, NS 9). As with the 2009 A(H1N1) viruses, all 8 segments of two swine H1N1 viruses, A/Swine/Chachoengsao/NIAH587/2005 and A/Swine/Chonburi/NIAH589/2005, appear on long branches with no close relatives. An H1N2 virus, A/Swine/Miyazaki/1/2006, shows a similar pattern for all but its NA sequence which was excluded from the analyses because it is not an N1. **A.** PB2, **B.** PB1, **C.** PA, **D.** HA, **E.** NP, **F.** NA, **G.** M, **H.** NS.



Fig. S2B PB1

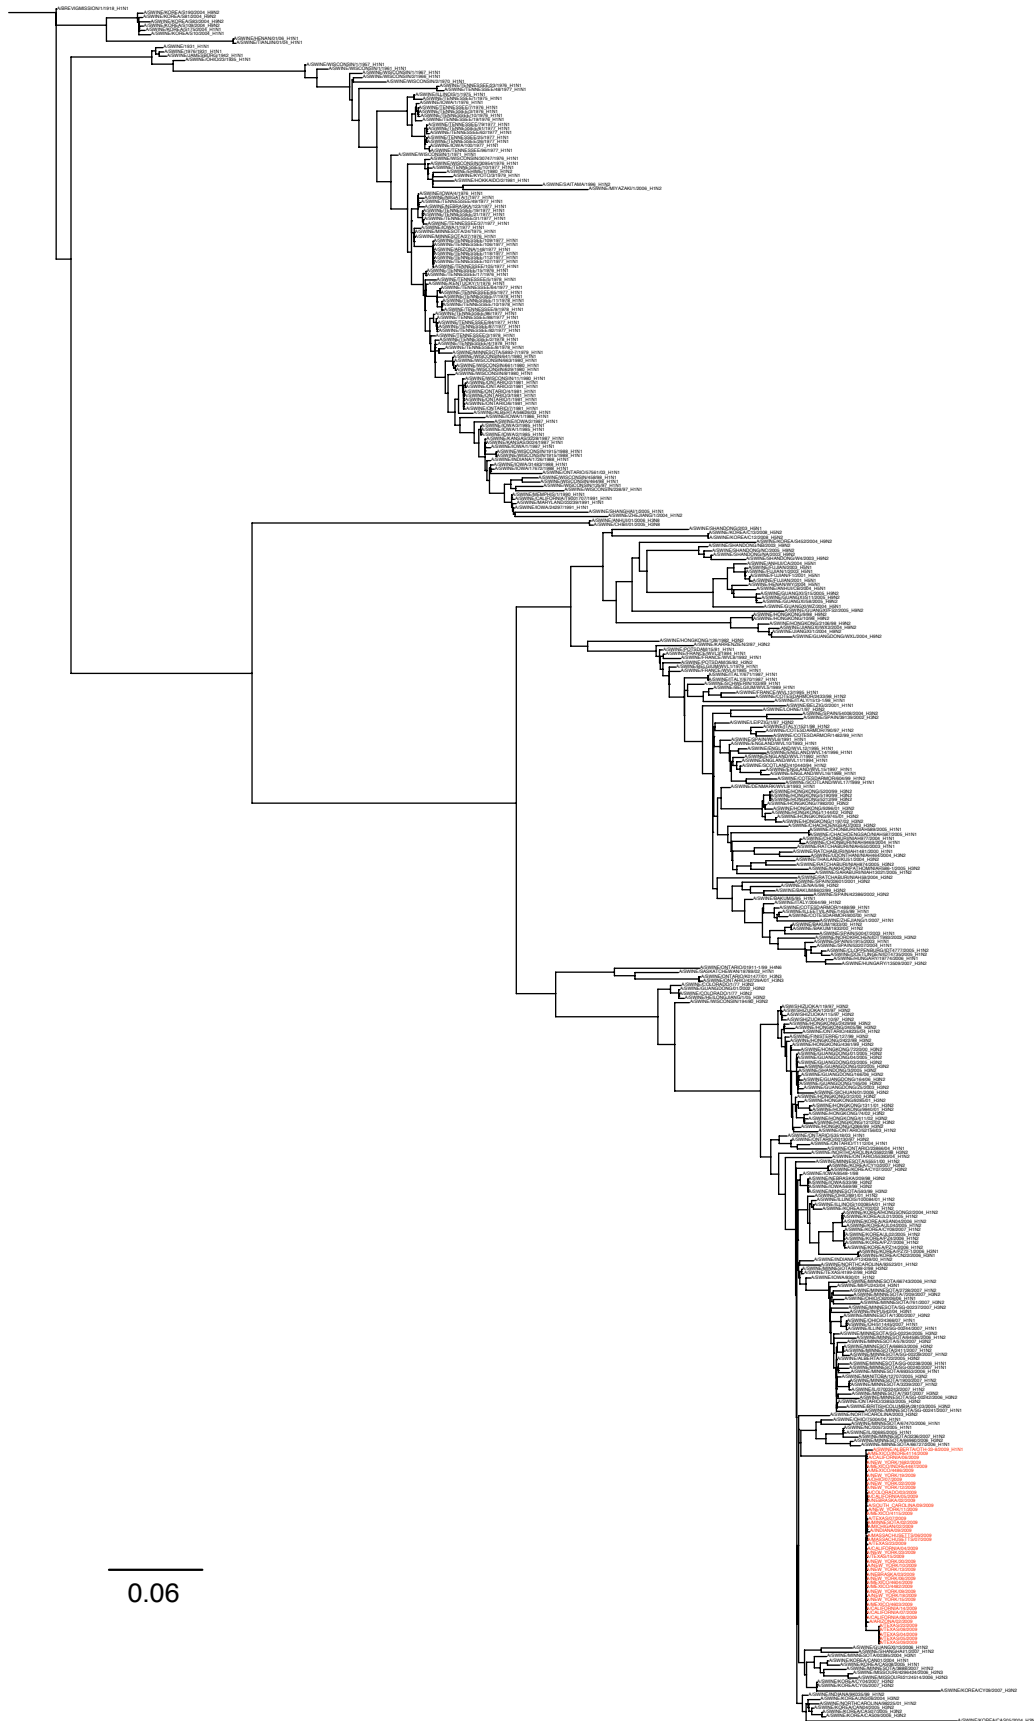



Fig. S2D HA

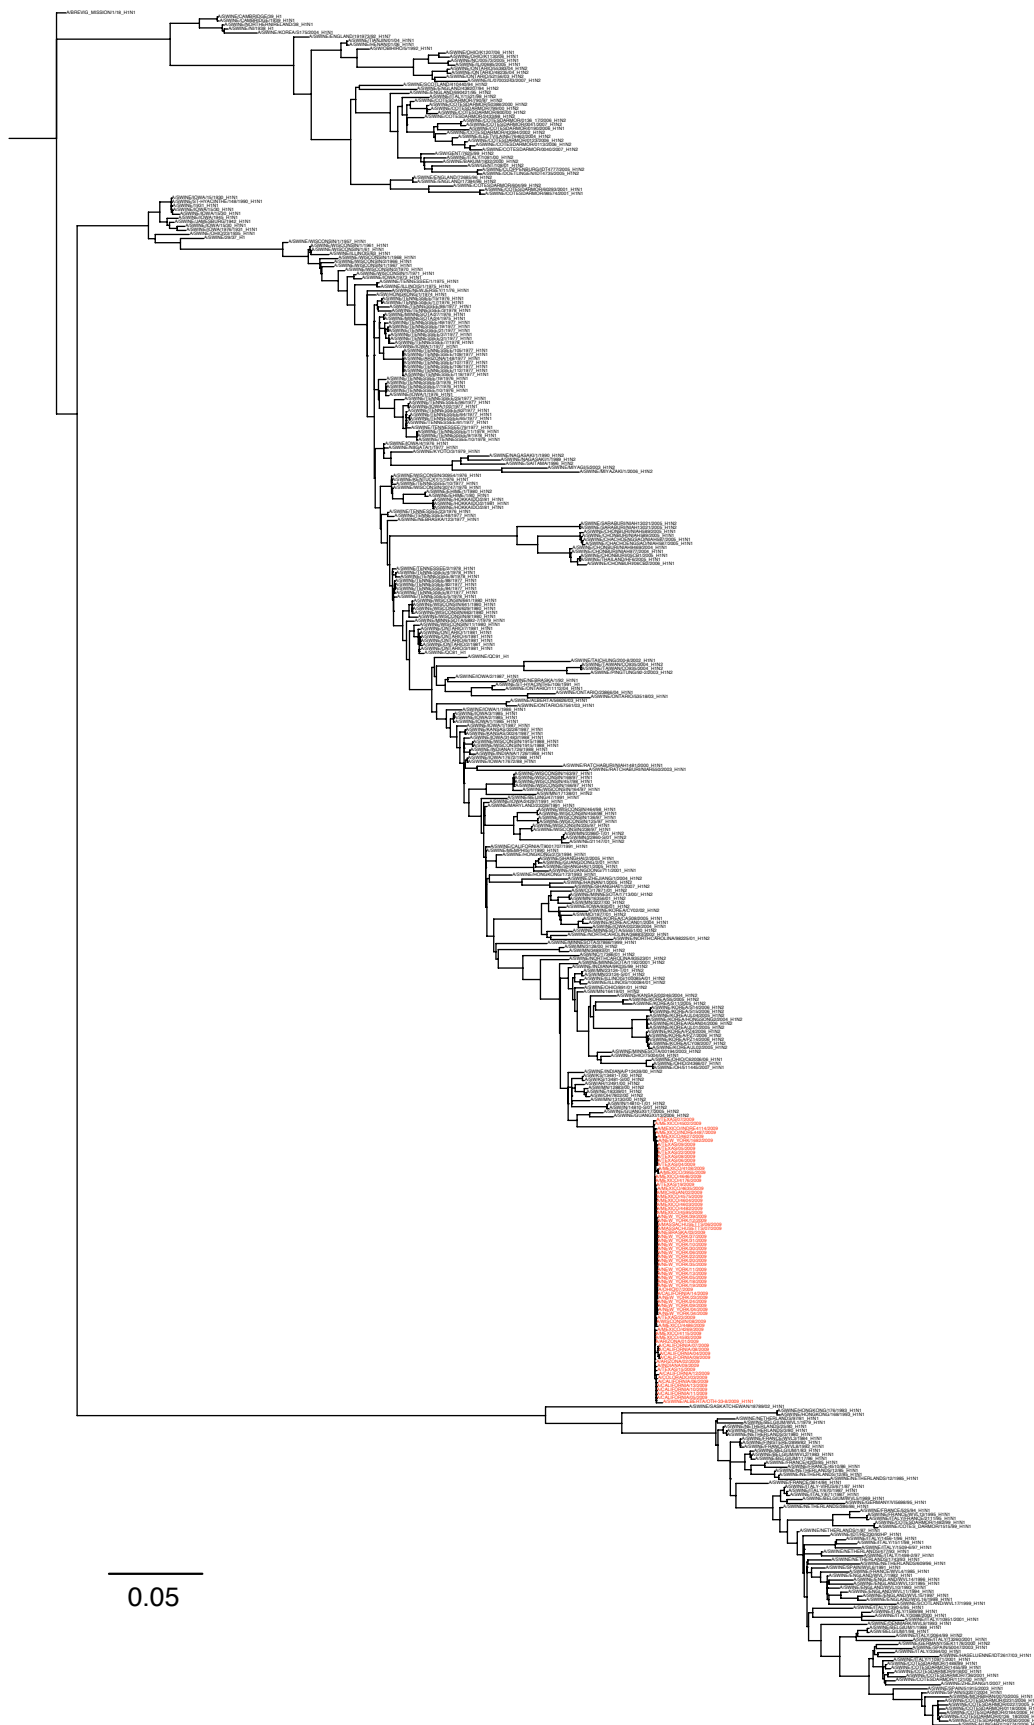



Fig. S2E NP

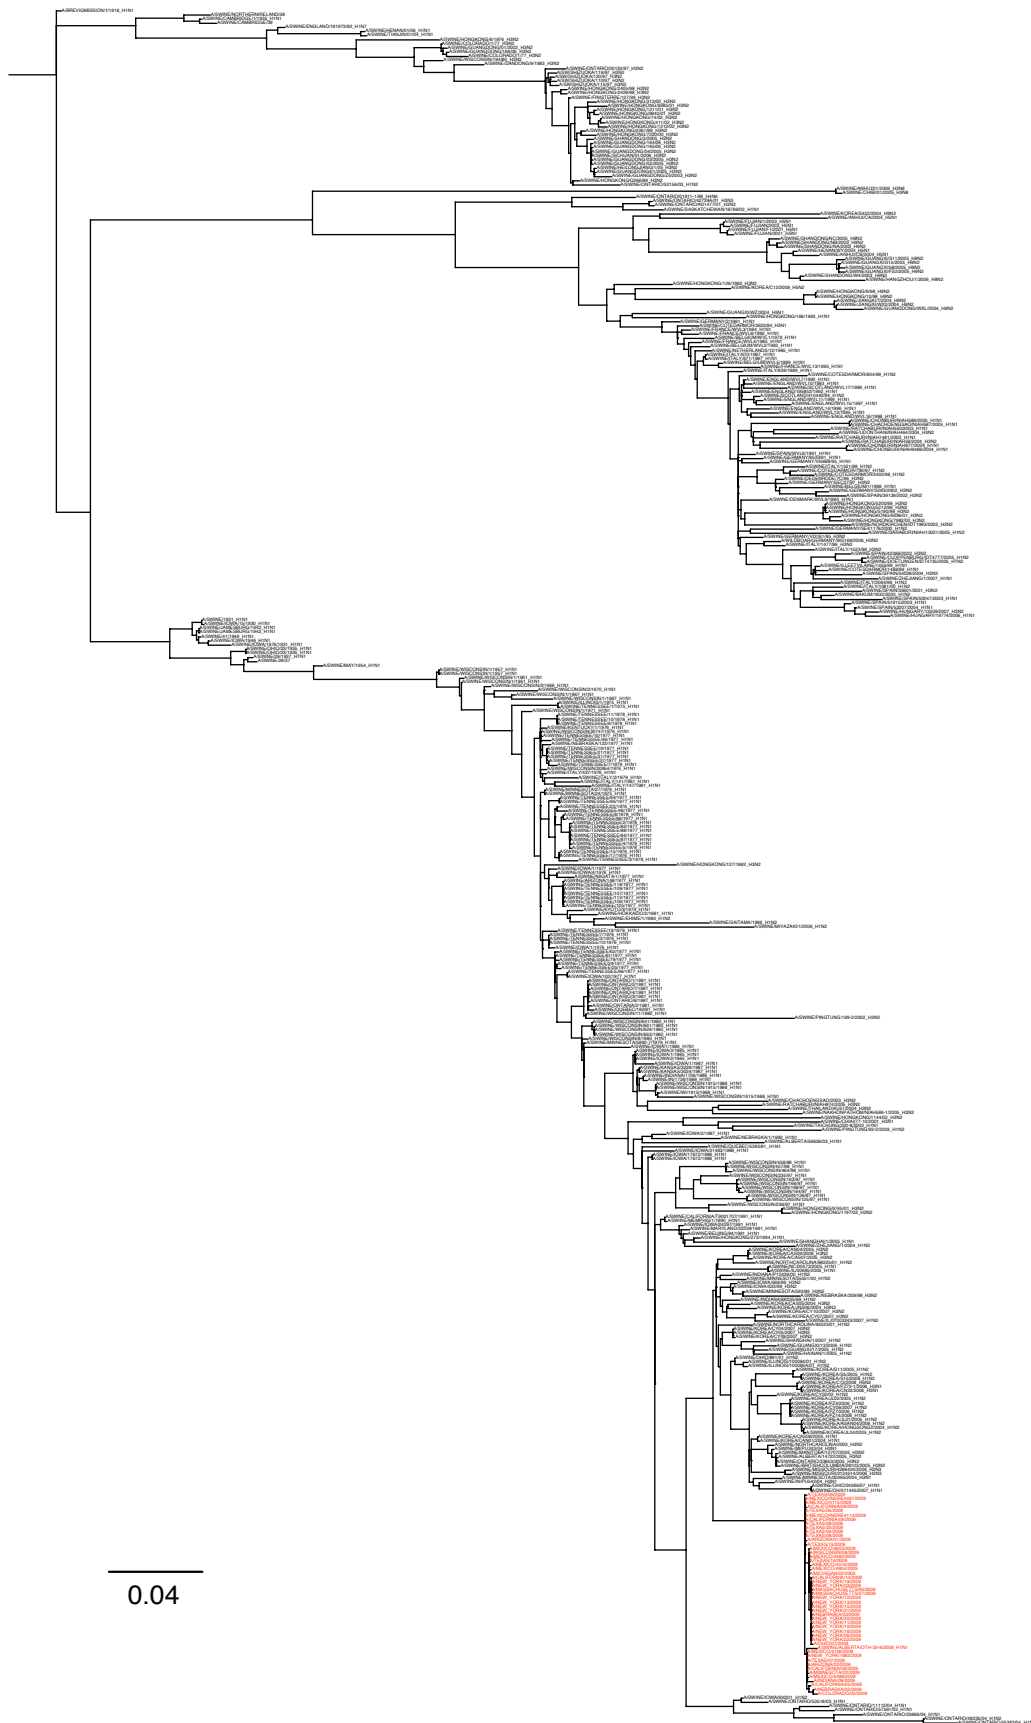



Fig. S2G M

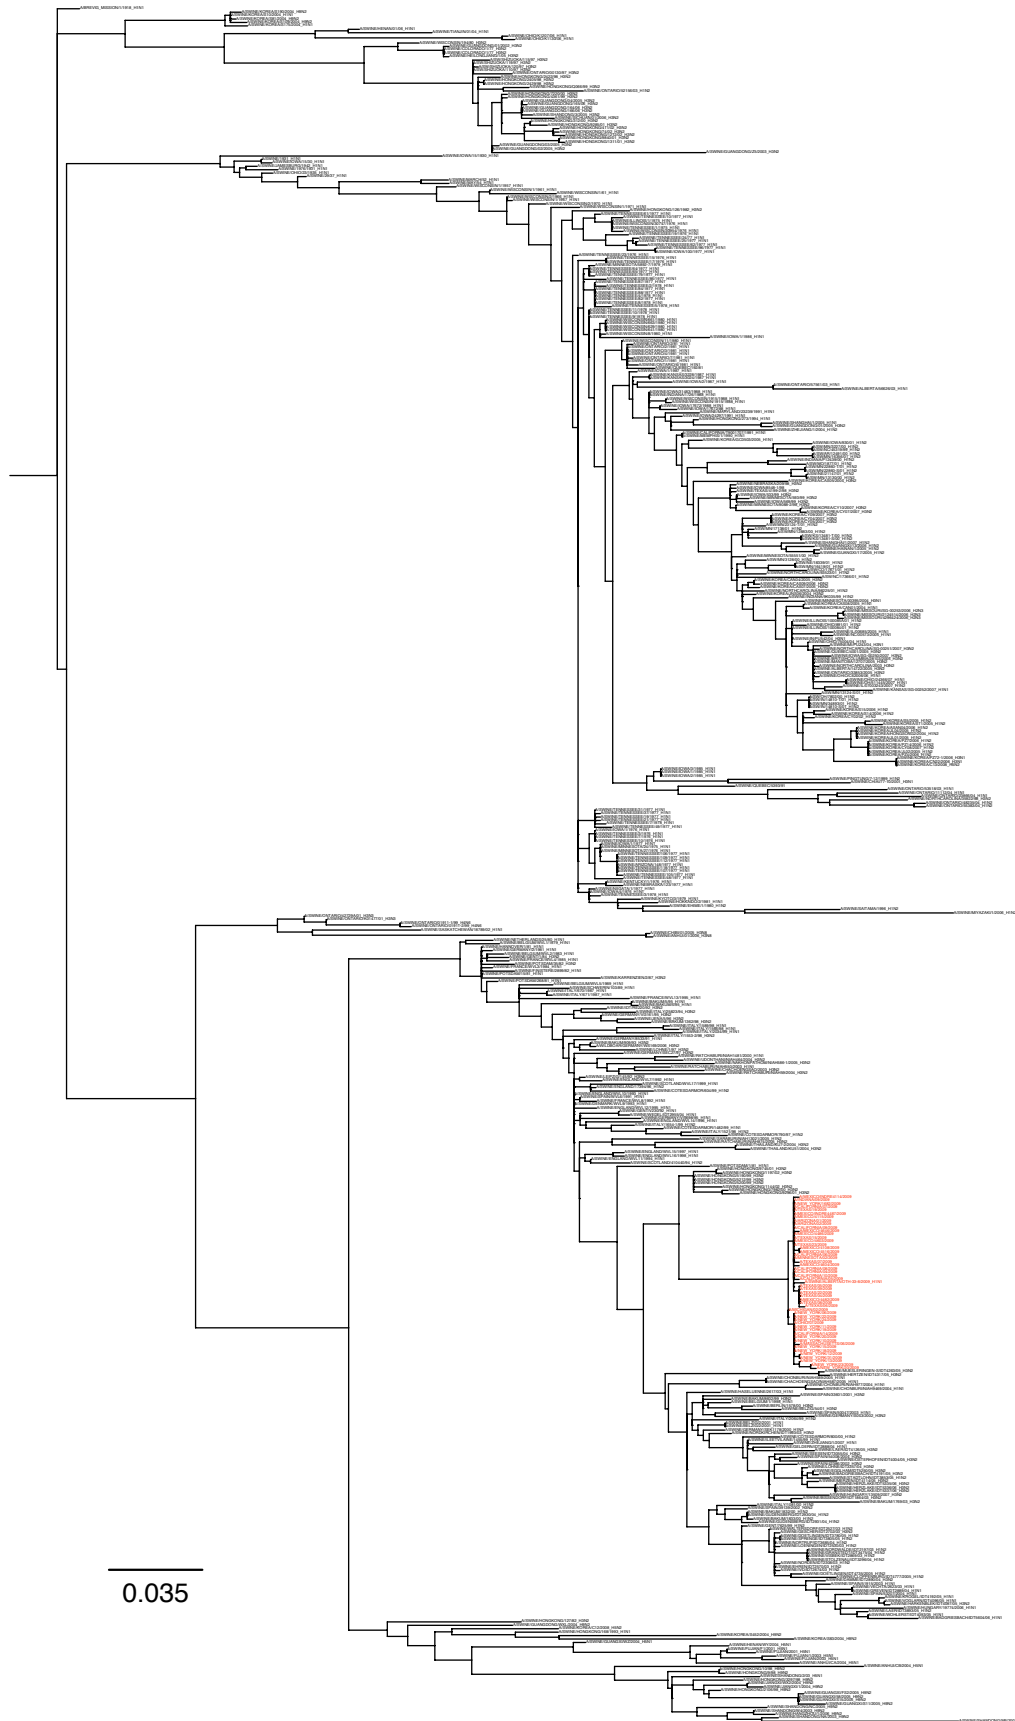

Fig. S2H NS

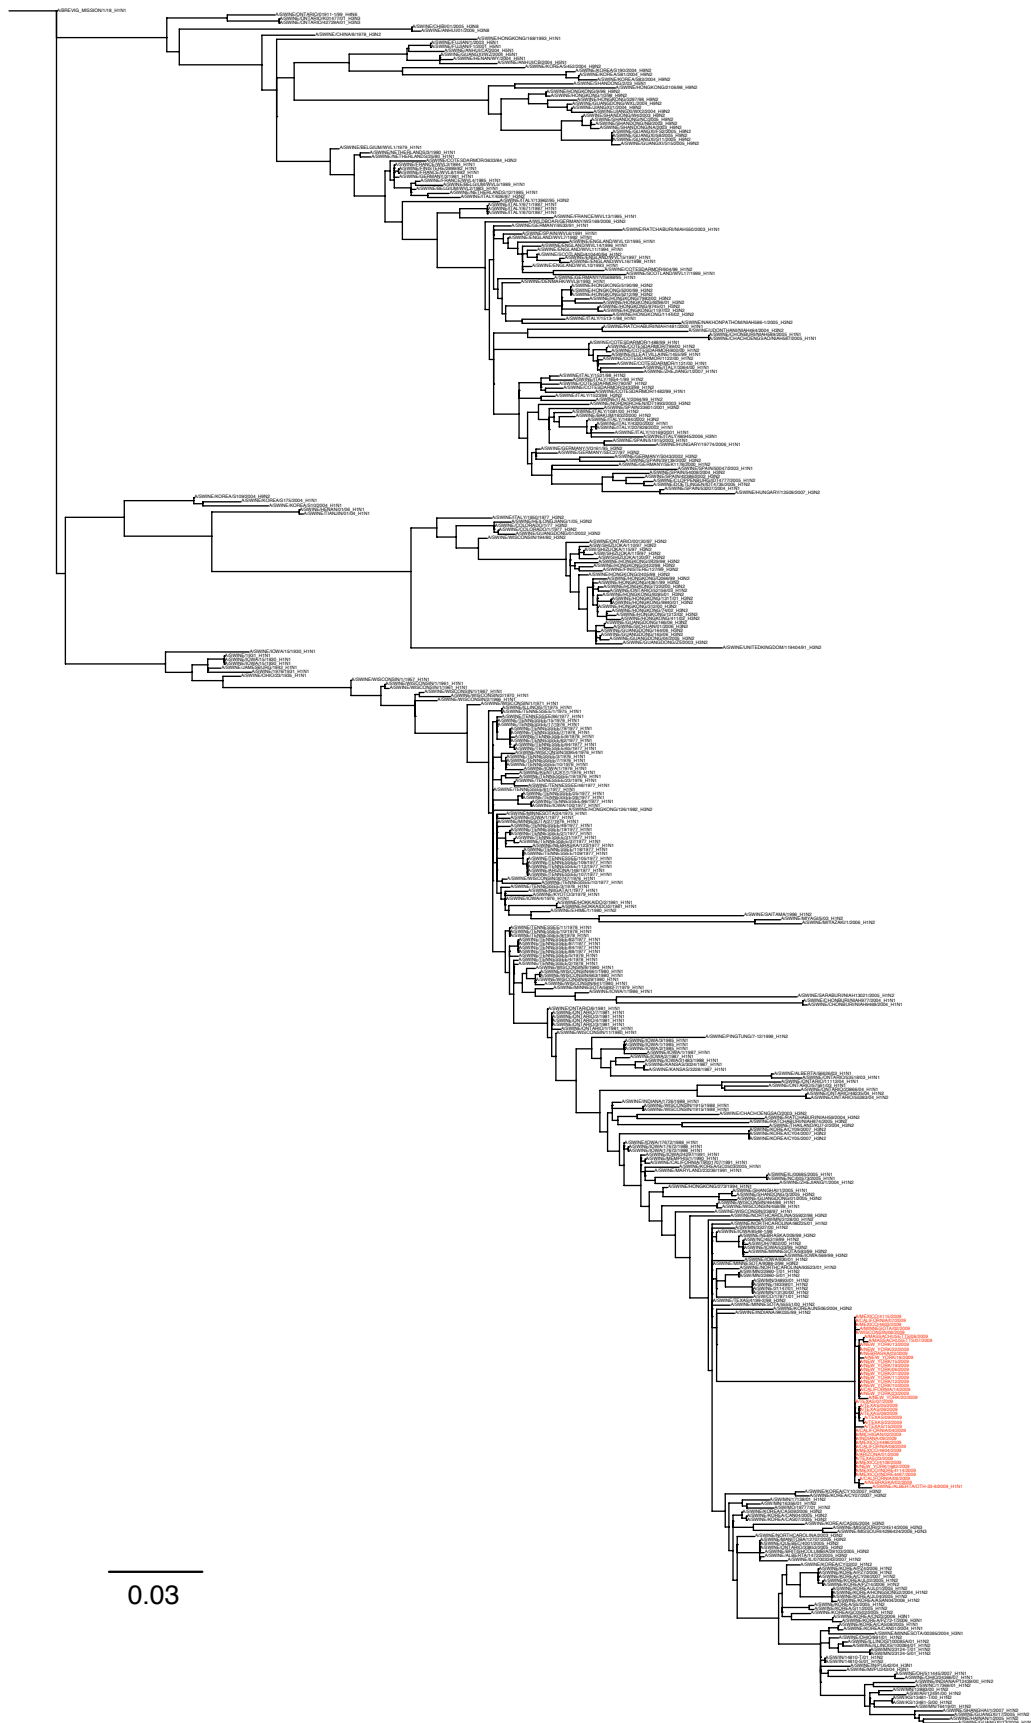

**Fig. S3.** Version of Fig. 3 from the main manuscript with names of each antigen and antiserum, and as a zoomable PDF to be able to make names legible.
